# Supplementary material for: Microbiome and metabolome analysis in smoking and non-smoking pancreatic ductal adenocarcinoma patients
Source: PubMed Central journal article supplement — BMC Microbiol. 2024 Dec 27;24:541. doi: 10.1186/s12866-024-03688-5 (PMC11673369; doi:10.1186/s12866-024-03688-5), 2024-12-27
Supplement: 12866_2024_3688_MOESM1_ESM.pdf [file 12866_2024_3688_MOESM1_ESM.pdf]

## SUPPLEMENTARY TABLES

**Table S1 Differential bacteria between smoking PDAC and non-smoking PDAC groups of tumor tissue from surgical samples**

| Species name                          | Group            | Mean     | LDA value | <i>P</i> |
|---------------------------------------|------------------|----------|-----------|----------|
| o__Gaiellales                         | PDAC_non-smoking | 2.307637 | 2.929493  | 0.017001 |
| p__unclassified_k__norank_d__Bacteria | PDAC_smoking     | 4.595560 | 4.195179  | 0.039318 |
| g__Slackia                            | PDAC_smoking     | 2.369785 | 3.263086  | 0.047912 |
| c__Thermoleophilia                    | PDAC_non-smoking | 2.307637 | 2.913857  | 0.017001 |
| o__unclassified_k__norank_d__Bacteria | PDAC_smoking     | 4.595560 | 4.195179  | 0.039318 |
| c__unclassified_k__norank_d__Bacteria | PDAC_smoking     | 4.595560 | 4.195179  | 0.039318 |
| g__Aeromonas                          | PDAC_non-smoking | 1.953362 | 3.386388  | 0.004373 |
| g__Aeromicrobium                      | PDAC_smoking     | 1.816943 | 3.385643  | 0.047912 |
| g__Turicibacter                       | PDAC_non-smoking | 2.743922 | 2.900026  | 0.017001 |
| f__Aeromonadaceae                     | PDAC_non-smoking | 1.953362 | 3.382760  | 0.004373 |
| g__Faecalibacterium                   | PDAC_non-smoking | 2.890487 | 2.863061  | 0.012222 |
| g__unclassified_k__norank_d__Bacteria | PDAC_smoking     | 4.595560 | 4.195179  | 0.039318 |
| f__unclassified_k__norank_d__Bacteria | PDAC_smoking     | 4.595560 | 4.195179  | 0.039318 |
| g__Bradyrhizobium                     | PDAC_non-smoking | 2.625058 | 3.017654  | 0.023870 |
| g__Selenomonas                        | PDAC_non-smoking | 2.798460 | 2.958753  | 0.034856 |
| o__Aeromonadales                      | PDAC_non-smoking | 1.953362 | 3.390673  | 0.004373 |
| f__Xanthobacteraceae                  | PDAC_non-smoking | 2.761896 | 2.904319  | 0.042611 |
| g__Faecalibaculum                     | PDAC_non-smoking | 2.478125 | 3.421223  | 0.046133 |

**Table S2 Differential metabolites between smoking PDAC and non-smoking PDAC groups of tumor tissue from surgical samples**

| Metabolite                                          | Regulate | VIP    | FC(smoking_PDAC/non-smoking_PDAC) | P             | FDR    | smoking_PDA C (mean±SD) | non-smoking_PD AC (mean±SD) |
|-----------------------------------------------------|----------|--------|-----------------------------------|---------------|--------|-------------------------|-----------------------------|
| PGP(16:0/TXB2)                                      | down     | 3.8694 | 0.6558                            | 0.01877       | 0.6188 | 2.925±1.287             | 4.46±1.57                   |
| PGP(22:6(4Z,7Z,10Z,13Z,16Z,19Z)/5-iso PGF2VI)       | down     | 4.0378 | 0.6319                            | 0.000925<br>4 | 0.9995 | 3.315±1.045             | 5.246±0.5221                |
| Lumirubin                                           | up       | 3.8688 | 1.2758                            | 0.03958       | 0.9995 | 6.106±0.4647            | 4.786±1.779                 |
| Demethylated antipyrine                             | down     | 3.5842 | 0.7317                            | 0.01563       | 0.7536 | 3.074±0.4118            | 4.201±1.207                 |
| Nalmefene                                           | down     | 3.3661 | 0.8065                            | 0.02084       | 0.9995 | 4.321±0.7311            | 5.358±0.8385                |
| Ile-Ile-Ala-Glu-Lys                                 | down     | 3.114  | 0.6632                            | 0.004551      | 0.9995 | 2.4±0.3123              | 3.619±1.094                 |
| 5-Hydroxy-L-tryptophan                              | down     | 2.9877 | 0.8796                            | 0.01698       | 0.9995 | 4.91±0.3704             | 5.582±0.6322                |
| LysoPC(P-18:1(9Z)/0:0)                              | down     | 2.9871 | 0.8483                            | 0.002007      | 0.9995 | 4.781±0.3115            | 5.636±0.6007                |
| Oxalic Acid                                         | down     | 2.9775 | 0.8274                            | 0.01359       | 0.7536 | 3.678±0.4982            | 4.445±0.574                 |
| 17-methylnonadecanoylcarnitine                      | down     | 2.9402 | 0.7992                            | 0.01525       | 0.7536 | 4.315±0.7183            | 5.399±0.8295                |
| Kinetensin 1-8                                      | down     | 2.8989 | 0.8153                            | 0.02209       | 0.9995 | 3.934±0.5435            | 4.825±0.8511                |
| Ile Ile                                             | down     | 2.6493 | 0.7426                            | 0.03158       | 0.9995 | 3.831±1.268             | 5.159±0.5926                |
| Asn Ala Glu Val Leu                                 | down     | 2.4866 | 0.8893                            | 0.04071       | 0.9995 | 5.124±0.6374            | 5.762±0.3291                |
| Hydroxyrepaglinide                                  | down     | 2.2196 | 0.8909                            | 0.04946       | 0.9995 | 4.901±0.4895            | 5.501±0.6215                |
| Val Asn Leu                                         | down     | 2.107  | 0.8359                            | 0.0387        | 0.9995 | 3.896±0.5677            | 4.661±0.7747                |
| Trp Ile                                             | down     | 2.0379 | 0.8588                            | 0.04813       | 0.9995 | 4.487±0.7728            | 5.225±0.3786                |
| PG(18:1(12Z)-2OH(9,10)/22:6(4Z,7Z,10Z,13Z,16Z,19Z)) | down     | 2.0304 | 0.8301                            | 0.04156       | 0.9995 | 4.12±0.817              | 4.963±0.5301                |
| N-Acetyl-L-methionine                               | up       | 2.0109 | 1.0888                            | 0.03831       | 0.9995 | 5.589±0.3611            | 5.133±0.4287                |
| Humilixanthin                                       | down     | 2.0049 | 0.8865                            | 0.03728       | 0.9995 | 4.265±0.4644            | 4.811±0.4508                |
| Naphthoxylactic acid                                | up       | 1.971  | 1.1444                            | 0.02671       | 0.7536 | 4.415±0.3933            | 3.858±0.5036                |

|                                      |      |        |        |          |        |               |               |
|--------------------------------------|------|--------|--------|----------|--------|---------------|---------------|
| Zedoarondiol                         | up   | 1.9304 | 1.179  | 0.03642  | 0.9995 | 4.848±0.2639  | 4.112±0.9681  |
| Guanosine 3'-monophosphate           | up   | 1.928  | 1.0922 | 0.0216   | 0.7536 | 6.004±0.2408  | 5.497±0.5482  |
| Cetyl recinoleate                    | down | 1.892  | 0.9267 | 0.02781  | 0.9995 | 5.258±0.3187  | 5.674±0.344   |
| METHACHOLINE                         | up   | 1.8713 | 1.0841 | 0.01233  | 0.9995 | 5.609±0.3068  | 5.174±0.2685  |
| Diaminopimelic acid                  | down | 1.8434 | 0.8741 | 0.04963  | 0.9995 | 4.095±0.4995  | 4.685±0.5837  |
| N-Acetyl-DL-Methionine               | up   | 1.8386 | 1.0561 | 0.03286  | 0.7536 | 6.27±0.2977   | 5.937±0.2172  |
| PI(PGJ2/20:1(11Z))                   | down | 1.771  | 0.777  | 0.03773  | 0.9995 | 3.175±0.8333  | 4.086±0.6363  |
| Uridine-5'-Monophosphate             | up   | 1.7629 | 1.1082 | 0.029    | 0.7536 | 5.573±0.3291  | 5.029±0.5755  |
| (9S,10S)-9,10-dihydroxyoctadecanoate | down | 1.7474 | 0.9525 | 0.02833  | 0.7536 | 5.369±0.1229  | 5.637±0.3158  |
| Homo-L-arginine                      | down | 1.7446 | 0.9018 | 0.04456  | 0.9995 | 4.694±0.4932  | 5.205±0.3535  |
| Prostratin                           | down | 1.6708 | 0.923  | 0.03481  | 0.9995 | 4.302±0.2886  | 4.661±0.3144  |
| 8-Azaspiro[4.5]decane-7,9-dione      | up   | 1.5809 | 1.0869 | 0.009585 | 0.9995 | 5.705±0.3341  | 5.249±0.204   |
| Neotussilagine                       | down | 1.5526 | 0.8552 | 0.04395  | 0.9995 | 3.249±0.4143  | 3.799±0.5823  |
| Citramalic Acid                      | up   | 1.492  | 1.0593 | 0.02789  | 0.7536 | 5.463±0.2821  | 5.157±0.1442  |
| (12R)-12-Hydroxyoctadec-9-enoic acid | up   | 1.4515 | 1.1106 | 0.04317  | 0.9995 | 4.981±0.3231  | 4.485±0.5778  |
| Lys-Lys-OH                           | down | 1.4497 | 0.961  | 0.01488  | 0.7536 | 5.393±0.1544  | 5.612±0.1505  |
| Asiaticoside                         | up   | 1.4273 | 1.1686 | 0.0464   | 0.9995 | 4.74±0.4944   | 4.056±0.769   |
| 2-Hydroxypyridine                    | up   | 1.195  | 1.0586 | 0.01608  | 0.7536 | 4.354±0.1759  | 4.113±0.1596  |
| Phthalic Acid                        | down | 1.1867 | 0.9741 | 0.03602  | 0.7536 | 6.082±0.1564  | 6.244±0.08384 |
| L-Lactic acid                        | up   | 1.173  | 1.0174 | 0.01477  | 0.7536 | 8.206±0.07917 | 8.066±0.1229  |
| 2,6-Dimethylocta-3,7-diene-1,6-diol  | up   | 1.1701 | 1.1578 | 0.01934  | 0.9995 | 3.58±0.2584   | 3.092±0.4866  |
| N-Nervonoyl Tryptophan               | up   | 1.1607 | 1.044  | 0.04872  | 0.9995 | 6.456±0.2676  | 6.184±0.1943  |
| Dinoterb                             | up   | 1.1249 | 1.0237 | 0.04222  | 0.7536 | 5.443±0.09391 | 5.317±0.1322  |
| 2-Hydroxy-3-Methylbutyric Acid       | up   | 1.0202 | 1.0327 | 0.03458  | 0.7536 | 5.899±0.1758  | 5.712±0.1071  |

**Table S3 Altered metabolic pathways between smoking PDAC and non-smoking PDAC groups of tumor tissue from surgical samples**

| <b>Pathway Description</b>   | <b>Ratio in study</b> | <b>Ratio in pop</b> | <b><i>P</i></b> |
|------------------------------|-----------------------|---------------------|-----------------|
| HIF-1 signaling pathway      | 1/8                   | 15/4407             | 0.02693         |
| Glucagon signaling pathway   | 1/8                   | 26/4407             | 0.04627         |
| Choline metabolism in cancer | 1/8                   | 11/4407             | 0.01981         |
| cAMP signaling pathway       | 1/8                   | 25/4407             | 0.04453         |
| Purine metabolism            | 2/8                   | 101/4407            | 0.01331         |

**Table S4 Differential bacteria between smoking PDAC and non-smoking PDAC groups of paracancerous tissue from surgical samples**

| <b>Species name</b>  | <b>Group</b>     | <b>Mean</b> | <b>LDA value</b> | <b><i>P</i></b> |
|----------------------|------------------|-------------|------------------|-----------------|
| o__Deinococcales     | PDAC_smoking     | 2.256276    | 3.083655         | 0.047913        |
| g__Romboutsia        | PDAC_non-smoking | 2.424143    | 3.078833         | 0.024968        |
| f__Nocardioideaceae  | PDAC_non-smoking | 2.616940    | 3.119963         | 0.023870        |
| g__Veillonella       | PDAC_smoking     | 4.430748    | 4.315691         | 0.036454        |
| g__Aeromicrobium     | PDAC_non-smoking | 2.573906    | 3.069251         | 0.046134        |
| g__Deinococcus       | PDAC_smoking     | 2.256276    | 3.083712         | 0.047913        |
| g__Enterococcus      | PDAC_smoking     | 4.664164    | 4.533765         | 0.027670        |
| f__Deinococcaceae    | PDAC_smoking     | 2.256276    | 3.083738         | 0.047913        |
| g__Streptomyces      | PDAC_non-smoking | 2.214884    | 3.375907         | 0.017002        |
| f__Enterococcaceae   | PDAC_smoking     | 4.664164    | 4.533789         | 0.027670        |
| f__Nocardiaceae      | PDAC_non-smoking | 2.698844    | 2.871430         | 0.023870        |
| f__Streptomycetaceae | PDAC_non-smoking | 2.214884    | 3.282668         | 0.017002        |
| p__Deinococcota      | PDAC_smoking     | 2.487057    | 3.101904         | 0.012074        |
| o__Streptomycetales  | PDAC_non-smoking | 2.214884    | 3.319216         | 0.017002        |
| c__Deinococci        | PDAC_smoking     | 2.487057    | 3.101913         | 0.012074        |
| g__Novosphingobium   | PDAC_smoking     | 2.610335    | 3.15903          | 0.025922        |
| o__Deinococcales     | PDAC_smoking     | 2.256276    | 3.083655         | 0.047913        |

**Table S5 Differential metabolites between smoking PDAC and non-smoking PDAC groups of paracancerous tissue from surgical samples**

| Metabolite                                   | Regulate | VI P   | FC(smoking_PDA C/non-smoking_P DAC) | P         | FD R    | smoking_PDA C (mean±SD) | non-smoking_PDA C (mean±SD) |
|----------------------------------------------|----------|--------|-------------------------------------|-----------|---------|-------------------------|-----------------------------|
| Schizandrin                                  | down     | 3.5308 | 0.2872                              | 9.44E-05  | 0.02375 | 1.493±1.376             | 5.199±1.245                 |
| Cromakalim                                   | up       | 3.1184 | 2.2012                              | 0.0005478 | 0.02392 | 5.043±0.4784            | 2.291±1.897                 |
| Dermorphin                                   | down     | 3.0754 | 0.3542                              | 0.005024  | 0.06558 | 1.881±2.426             | 5.311±0.7707                |
| MG(14:1(9Z)/0:0/0:0)                         | down     | 2.9205 | 0.5169                              | 0.01178   | 0.04997 | 3.067±2.295             | 5.934±0.9112                |
| BUTHIONINE SULFOXIMINE                       | down     | 2.8773 | 0.4823                              | 0.001466  | 0.03871 | 2.535±1.587             | 5.256±0.6785                |
| Bempedoic acid                               | down     | 2.86   | 0.6257                              | 5.41E-05  | 0.02185 | 3.723±0.7594            | 5.95±0.7483                 |
| Glucosaminylmuramyl-2-alanine-D-isoglutamine | down     | 2.858  | 0.4988                              | 0.00497   | 0.06558 | 2.814±2.006             | 5.642±0.58                  |

|                                       |          |                |        |                   |             |                  |                  |
|---------------------------------------|----------|----------------|--------|-------------------|-------------|------------------|------------------|
|                                       |          | 4              |        | 2                 |             |                  |                  |
| PGP(16:0/TXB2)                        | dow<br>n | 2.8<br>44      | 0.5353 | 0.00<br>018<br>59 | 0.02<br>425 | 2.891±<br>1.068  | 5.401±0.<br>7514 |
| 21-Desacetyl Deflazacort              | dow<br>n | 2.8<br>37<br>4 | 0.4509 | 0.00<br>517<br>4  | 0.06<br>635 | 2.651±<br>2.288  | 5.88±0.7<br>635  |
| MG(5-iso PGF2VI/0:0/0:0)              | dow<br>n | 2.8<br>15      | 0.6164 | 5.18<br>E-0<br>5  | 0.02<br>185 | 3.907±<br>0.6484 | 6.338±1.<br>064  |
| L-Theanine                            | dow<br>n | 2.7<br>93<br>7 | 0.5211 | 0.00<br>038<br>06 | 0.02<br>694 | 2.396±<br>0.6106 | 4.598±1.<br>301  |
| Allysine                              | dow<br>n | 2.7<br>79<br>1 | 0.5614 | 0.00<br>071<br>57 | 0.02<br>962 | 3.21±1.<br>338   | 5.718±0.<br>5732 |
| Ile Asp Val                           | dow<br>n | 2.6<br>76<br>1 | 0.5847 | 0.01<br>253       | 0.09<br>18  | 3.462±<br>2.059  | 5.921±0.<br>3427 |
| Pro Val Ala                           | dow<br>n | 2.6<br>66      | 0.5503 | 0.00<br>298<br>7  | 0.05<br>354 | 3.051±<br>1.67   | 5.544±0.<br>2431 |
| Val Thr Leu                           | dow<br>n | 2.6<br>62<br>8 | 0.6094 | 0.00<br>019<br>4  | 0.02<br>425 | 3.47±1.<br>039   | 5.694±0.<br>3665 |
| PS(22:2(13Z,16Z)/18:4(6Z,9Z,12Z,15Z)) | dow      | 2.6            | 0.5276 | 0.00              | 0.03        | 2.468±           | 4.678±0.         |

|                |          |                |        |                  |             |                  |                  |
|----------------|----------|----------------|--------|------------------|-------------|------------------|------------------|
|                | n        | 53<br>4        |        | 110<br>3         | 51          | 1.269            | 4085             |
| Leu His Ile    | dow<br>n | 2.6<br>18<br>4 | 0.565  | 0.00<br>161<br>6 | 0.03<br>888 | 2.756±<br>1.237  | 4.878±0.<br>6013 |
| Bersimoside I  | dow<br>n | 2.5<br>99<br>6 | 0.4015 | 0.00<br>366<br>6 | 0.05<br>927 | 1.86±1.<br>903   | 4.633±0.<br>3731 |
| Carboprost     | dow<br>n | 2.5<br>74<br>3 | 0.7601 | 5.76<br>E-0<br>6 | 0.01<br>188 | 5.747±<br>0.3639 | 7.561±0.<br>6759 |
| Heliotridine   | dow<br>n | 2.5<br>23<br>5 | 0.6065 | 0.00<br>519<br>9 | 0.06<br>635 | 3.486±<br>1.643  | 5.748±0.<br>2368 |
| Nalmefene      | dow<br>n | 2.5<br>22<br>1 | 0.7002 | 0.00<br>033<br>3 | 0.02<br>694 | 4.444±<br>0.8295 | 6.347±0.<br>6878 |
| Gly Leu Leu    | dow<br>n | 2.5<br>21<br>4 | 0.6141 | 0.00<br>121<br>8 | 0.03<br>596 | 3.407±<br>1.248  | 5.548±0.<br>3819 |
| Bms-275183     | dow<br>n | 2.5<br>10<br>9 | 0.6567 | 0.00<br>487      | 0.06<br>534 | 3.872±<br>1.452  | 5.896±0.<br>2592 |
| Oxypinnatanine | dow<br>n | 2.4<br>97<br>4 | 0.6818 | 0.00<br>134<br>1 | 0.03<br>709 | 4.096±<br>1.144  | 6.008±0.<br>2284 |



|                                             |          |                |        |                   |             |                  |                  |
|---------------------------------------------|----------|----------------|--------|-------------------|-------------|------------------|------------------|
| Nandrolone                                  | dow<br>n | 2.4<br>73<br>6 | 0.7145 | 8.56<br>E-0<br>5  | 0.02<br>375 | 4.398±<br>0.6839 | 6.155±0.<br>4996 |
| 9-(2,3-dihydroxypropoxy)-9-Oxononanoic Acid | dow<br>n | 2.4<br>64<br>2 | 0.7038 | 0.00<br>083<br>05 | 0.02<br>392 | 4.049±<br>0.648  | 5.753±0.<br>9711 |
| Hypromellose                                | dow<br>n | 2.4<br>62<br>7 | 0.6315 | 0.00<br>107<br>1  | 0.03<br>501 | 3.384±<br>1.054  | 5.359±0.<br>6548 |
| Lumirubin                                   | up       | 2.4<br>48<br>7 | 1.4431 | 0.00<br>162<br>2  | 0.03<br>888 | 5.957±<br>0.6163 | 4.128±1.<br>278  |
| Ser Thr Pro Asp Ala                         | dow<br>n | 2.4<br>37<br>3 | 0.6004 | 0.04<br>503       | 0.13<br>99  | 3.324±<br>2.317  | 5.536±0.<br>9681 |
| 14-Deoxy-11,12-Didehydroandrographolide     | dow<br>n | 2.4<br>12<br>4 | 0.7038 | 0.00<br>116<br>4  | 0.03<br>577 | 4.374±<br>0.6485 | 6.215±1.<br>183  |
| Epsilon-Caprolactone                        | dow<br>n | 2.3<br>83<br>3 | 0.7155 | 0.00<br>041<br>65 | 0.02<br>694 | 4.149±<br>0.4482 | 5.799±0.<br>996  |
| Phe Pro His                                 | dow<br>n | 2.3<br>80<br>2 | 0.7002 | 0.00<br>069<br>57 | 0.02<br>962 | 4.297±<br>0.9533 | 6.137±0.<br>5126 |
| Ganglioside GM3 (d18:0/14:0)                | dow<br>n | 2.3<br>65      | 0.7602 | 0.00<br>040       | 0.02<br>694 | 4.959±<br>0.6446 | 6.523±0.<br>677  |

|                                                                                                |          |                |        |                   |             |                  |                  |
|------------------------------------------------------------------------------------------------|----------|----------------|--------|-------------------|-------------|------------------|------------------|
|                                                                                                |          | 9              |        | 2                 |             |                  |                  |
| Thr Glu Ile                                                                                    | dow<br>n | 2.3<br>58<br>7 | 0.6376 | 0.01<br>737       | 0.10<br>05  | 3.551±<br>1.785  | 5.569±0.<br>3771 |
| Arginylasparagine                                                                              | dow<br>n | 2.3<br>34<br>1 | 0.7209 | 0.00<br>049<br>89 | 0.02<br>694 | 4.078±<br>0.7391 | 5.657±0.<br>5569 |
| 4-Fluoro-N-methyl-L-phenylalanyl-N-methyl-L-valyl-3-(1,1-dimethylethyl)-N-ethyl-L-tyrosinamide | dow<br>n | 2.3<br>27<br>1 | 0.6886 | 0.00<br>132<br>9  | 0.03<br>709 | 3.922±<br>0.9696 | 5.696±0.<br>6147 |
| 9-Oxo-nonanoic acid                                                                            | dow<br>n | 2.3<br>13<br>1 | 0.6796 | 0.00<br>260<br>2  | 0.02<br>67  | 3.39±0.<br>7215  | 4.988±1.<br>035  |
| Histidylleucine                                                                                | dow<br>n | 2.3<br>11<br>1 | 0.7644 | 0.00<br>106<br>6  | 0.03<br>501 | 5.087±<br>0.8483 | 6.655±0.<br>4852 |
| 9-F1-phytoprostane                                                                             | dow<br>n | 2.2<br>95<br>9 | 0.7363 | 0.00<br>134<br>1  | 0.03<br>709 | 4.44±0.<br>5981  | 6.03±1.0<br>11   |
| Ser Asp Ile                                                                                    | dow<br>n | 2.2<br>93<br>7 | 0.7236 | 0.00<br>345<br>4  | 0.05<br>811 | 4.367±<br>1.068  | 6.035±0.<br>5613 |
| Cinnassiol D2                                                                                  | dow<br>n | 2.2<br>92<br>5 | 0.6133 | 0.02<br>39        | 0.10<br>92  | 3.236±<br>1.425  | 5.276±1.<br>776  |
| Trp Thr Gln                                                                                    | dow      | 2.2            | 0.5586 | 0.02              | 0.10        | 2.694±           | 4.823±0.         |

|                               |     |     |        |      |      |        |          |
|-------------------------------|-----|-----|--------|------|------|--------|----------|
|                               | n   | 84  |        | 138  | 62   | 1.931  | 6142     |
|                               |     | 9   |        |      |      |        |          |
| Val Ile Leu                   | dow | 2.2 | 0.6737 | 0.01 | 0.08 | 3.915± | 5.811±0. |
|                               | n   | 77  |        | 064  | 684  | 1.48   | 6406     |
|                               |     | 3   |        |      |      |        |          |
| PGP(i-22:0/6 keto-PGF1 alpha) | dow | 2.2 | 0.5135 | 0.00 | 0.08 | 2.306± | 4.491±0. |
|                               | n   | 71  |        | 859  | 251  | 1.641  | 7311     |
|                               |     | 9   |        | 5    |      |        |          |
| Valylisoleucine               | dow | 2.2 | 0.7577 | 0.00 | 0.02 | 4.321± | 5.703±0. |
|                               | n   | 63  |        | 194  | 589  | 0.725  | 6641     |
|                               |     | 5   |        | 6    |      |        |          |
| Agavasaponin D                | dow | 2.2 | 0.6482 | 0.00 | 0.07 | 3.027± | 4.67±0.7 |
|                               | n   | 62  |        | 690  | 626  | 1.123  | 515      |
|                               |     | 7   |        | 4    |      |        |          |
| Gly Asp Leu                   | dow | 2.2 | 0.7447 | 0.00 | 0.04 | 4.302± | 5.777±0. |
|                               | n   | 60  |        | 2    | 456  | 0.8796 | 4475     |
|                               |     | 9   |        |      |      |        |          |
| His Ser Val Glu               | dow | 2.2 | 0.6218 | 0.01 | 0.09 | 3.265± | 5.251±0. |
|                               | n   | 48  |        | 453  | 575  | 1.688  | 4476     |
|                               |     | 3   |        |      |      |        |          |
| Gln Ala Phe                   | dow | 2.2 | 0.4571 | 0.03 | 0.12 | 1.663± | 3.638±2. |
|                               | n   | 47  |        | 537  | 67   | 1.264  | 163      |
|                               |     | 8   |        |      |      |        |          |
| 6-Hydroxymelatonin            | dow | 2.2 | 0.7309 | 0.00 | 0.02 | 3.909± | 5.348±0. |
|                               | n   | 39  |        | 030  | 392  | 0.6267 | 5051     |
|                               |     | 7   |        | 81   |      |        |          |

|                                                         |          |                |        |                   |             |                  |                  |
|---------------------------------------------------------|----------|----------------|--------|-------------------|-------------|------------------|------------------|
| Asparaginylisoleucine                                   | dow<br>n | 2.2<br>38<br>7 | 0.7431 | 0.00<br>455<br>1  | 0.03<br>282 | 3.997±<br>0.8912 | 5.379±0.<br>5773 |
| 5-Deoxydiplosporin                                      | dow<br>n | 2.2<br>32<br>6 | 0.5837 | 0.02<br>413       | 0.10<br>95  | 2.311±<br>1.442  | 3.959±0.<br>8485 |
| Valylglutamine                                          | dow<br>n | 2.2<br>30<br>1 | 0.7541 | 0.00<br>011<br>5  | 0.02<br>375 | 4.308±<br>0.5922 | 5.713±0.<br>3323 |
| Isoguvacine                                             | dow<br>n | 2.2<br>27<br>4 | 0.6634 | 0.01<br>153       | 0.08<br>971 | 3.66±1.<br>524   | 5.517±0.<br>3323 |
| 6-n-Octylaminouracil                                    | dow<br>n | 2.2<br>27<br>2 | 0.7708 | 0.00<br>420<br>7  | 0.03<br>139 | 4.133±<br>0.8117 | 5.362±0.<br>4188 |
| Imazapyr                                                | dow<br>n | 2.2<br>21<br>4 | 0.7504 | 0.00<br>053<br>36 | 0.02<br>694 | 4.308±<br>0.7017 | 5.741±0.<br>4413 |
| (11E,15Z)-9,10,13-Trihydroxy-11,15-octadecadienoic acid | dow<br>n | 2.2<br>11<br>6 | 0.7493 | 0.00<br>261<br>4  | 0.04<br>942 | 4.728±<br>0.7137 | 6.31±1.0<br>27   |
| PIP(20:0/22:6(5Z,8E,10Z,13Z,15E,19Z)-2OH(7S, 17S))      | dow<br>n | 2.2<br>08<br>8 | 0.5938 | 0.00<br>502<br>7  | 0.06<br>558 | 2.74±1.<br>209   | 4.614±0.<br>8439 |
| 10-(2,3-Dihydroxypropoxy)-10-oxodecanoic acid           | dow<br>n | 2.2<br>01      | 0.7184 | 0.00<br>265       | 0.04<br>965 | 3.9±0.9<br>968   | 5.429±0.<br>2431 |

|                                                     |          |                |        |                   |             |                  |                  |
|-----------------------------------------------------|----------|----------------|--------|-------------------|-------------|------------------|------------------|
|                                                     |          |                |        | 5                 |             |                  |                  |
| S-(PGA2)-glutathione                                | dow<br>n | 2.1<br>86<br>5 | 0.7499 | 0.00<br>071<br>07 | 0.02<br>962 | 4.33±0.<br>7471  | 5.774±0.<br>413  |
| 4-Oxododecanedioic acid                             | dow<br>n | 2.1<br>85<br>8 | 0.7337 | 0.00<br>785<br>4  | 0.04<br>105 | 4.186±<br>0.9368 | 5.705±0.<br>9716 |
| 13-HODE                                             | dow<br>n | 2.1<br>81<br>4 | 0.7148 | 0.00<br>417<br>8  | 0.06<br>179 | 3.937±<br>0.5098 | 5.508±1.<br>324  |
| PG(18:1(12Z)-2OH(9,10)/22:6(4Z,7Z,10Z,13Z,16Z,19Z)) | dow<br>n | 2.1<br>81<br>3 | 0.7105 | 0.00<br>053<br>87 | 0.02<br>694 | 3.952±<br>0.7929 | 5.562±0.<br>4858 |
| PGP(20:3(8Z,11Z,14Z)/6 keto-PGF1alpha)              | dow<br>n | 2.1<br>79<br>3 | 0.6706 | 0.00<br>164<br>2  | 0.03<br>912 | 3.619±<br>1.061  | 5.397±0.<br>4163 |
| Val-pro-pro                                         | dow<br>n | 2.1<br>59<br>1 | 0.7872 | 0.00<br>105<br>3  | 0.03<br>501 | 5.017±<br>0.7315 | 6.373±0.<br>4202 |
| Aspartyl-Valine                                     | dow<br>n | 2.1<br>52<br>3 | 0.788  | 0.03<br>067       | 0.07<br>918 | 4.694±<br>1.206  | 5.957±0.<br>5332 |
| Val Ala Ser                                         | dow<br>n | 2.1<br>45<br>1 | 0.6722 | 0.01<br>588       | 0.09<br>835 | 4.002±<br>1.666  | 5.954±0.<br>5648 |
| LysoPC(20:3(8Z,11Z,14Z)/0:0)                        | dow      | 2.1            | 0.7749 | 0.01              | 0.09        | 4.946±           | 6.383±0.         |

|                                                           |     |     |        |      |      |         |          |
|-----------------------------------------------------------|-----|-----|--------|------|------|---------|----------|
|                                                           | n   | 42  |        | 189  | 023  | 1.197   | 1293     |
|                                                           |     | 8   |        |      |      |         |          |
| Gly His                                                   | dow | 2.1 | 0.6845 | 0.00 | 0.07 | 3.454±  | 5.046±0. |
|                                                           | n   | 41  |        | 605  | 258  | 1.07    | 6984     |
|                                                           |     | 7   |        | 7    |      |         |          |
| Pro Ser Ile                                               | dow | 2.1 | 0.7073 | 0.00 | 0.06 | 3.892±  | 5.503±0. |
|                                                           | n   | 40  |        | 39   | 007  | 1.11    | 2648     |
|                                                           |     | 3   |        |      |      |         |          |
| 9,10-Epoxystearic acid                                    | dow | 2.1 | 0.7207 | 0.00 | 0.02 | 3.452±  | 4.79±0.6 |
|                                                           | n   | 38  |        | 041  | 694  | 0.5304  | 205      |
|                                                           |     | 1   |        | 81   |      |         |          |
| Demethylated antipyrine                                   | dow | 2.1 | 0.7294 | 0.00 | 0.02 | 3.903±  | 5.351±0. |
|                                                           | n   | 35  |        | 091  | 392  | 0.5618  | 8298     |
|                                                           |     | 8   |        | 88   |      |         |          |
| Lyciumoside I                                             | dow | 2.1 | 0.7133 | 0.00 | 0.08 | 3.98±1. | 5.58±0.1 |
|                                                           | n   | 25  |        | 897  | 337  | 269     | 561      |
|                                                           |     | 6   |        | 1    |      |         |          |
| Leu Pro Arg                                               | dow | 2.1 | 0.7161 | 0.00 | 0.08 | 4.144±  | 5.787±0. |
|                                                           | n   | 24  |        | 892  | 337  | 1.118   | 9113     |
|                                                           |     |     |        | 2    |      |         |          |
| (9Z,11E,13S,15Z)-13-Hydroxyoctadeca-9,11,15-trienoic acid | dow | 2.1 | 0.7955 | 0.00 | 0.03 | 5.177±  | 6.508±0. |
|                                                           | n   | 15  |        | 144  | 87   | 0.6239  | 7        |
|                                                           |     | 3   |        | 6    |      |         |          |
| Prostaglandin A2                                          | dow | 2.1 | 0.7025 | 0.00 | 0.02 | 3.856±  | 5.489±0. |
|                                                           | n   | 12  |        | 137  | 419  | 0.7565  | 86       |
|                                                           |     | 5   |        | 3    |      |         |          |

|                                                           |          |                |        |                   |             |                  |                  |
|-----------------------------------------------------------|----------|----------------|--------|-------------------|-------------|------------------|------------------|
| Ferulic acid                                              | dow<br>n | 2.1<br>01<br>2 | 0.714  | 0.00<br>524<br>4  | 0.06<br>671 | 3.195±<br>0.3814 | 4.475±1.<br>147  |
| Uric Acid                                                 | up       | 2.1<br>00<br>3 | 1.3353 | 0.01<br>69        | 0.05<br>932 | 6.774±<br>0.3227 | 5.073±1.<br>987  |
| Thr Ile Ala                                               | dow<br>n | 2.0<br>99<br>2 | 0.7779 | 0.00<br>17        | 0.03<br>981 | 4.897±<br>0.8257 | 6.295±0.<br>3774 |
| Ser Val Gln Leu Leu                                       | dow<br>n | 2.0<br>98<br>5 | 0.7545 | 0.00<br>136<br>9  | 0.03<br>738 | 4.478±<br>0.7844 | 5.935±0.<br>5479 |
| Leu Val Ala                                               | dow<br>n | 2.0<br>97<br>3 | 0.6979 | 0.00<br>041<br>97 | 0.02<br>694 | 3.636±<br>0.6587 | 5.21±0.6<br>74   |
| Gly Val Leu                                               | dow<br>n | 2.0<br>89<br>1 | 0.682  | 0.03<br>732       | 0.12<br>86  | 4.012±<br>1.935  | 5.883±0.<br>4569 |
| Bis(4-methoxybenzoyl)-3a,29-dihydroxy-8-multifloren-7-one | dow<br>n | 2.0<br>83<br>4 | 0.7056 | 0.00<br>010<br>07 | 0.02<br>375 | 3.385±<br>0.5543 | 4.797±0.<br>4197 |
| Isoleucyl-Valine                                          | dow<br>n | 2.0<br>69<br>1 | 0.7707 | 0.00<br>269<br>9  | 0.02<br>68  | 4.338±<br>0.7402 | 5.629±0.<br>5801 |
| Citric Acid                                               | up       | 2.0<br>64      | 1.2823 | 0.01<br>844       | 0.06<br>205 | 6.5±0.9<br>867   | 5.069±1.<br>127  |

|                                                  |          |                |        |                   |             |                  |                  |
|--------------------------------------------------|----------|----------------|--------|-------------------|-------------|------------------|------------------|
|                                                  |          | 2              |        |                   |             |                  |                  |
| 11'-Carboxy-gamma-tocotrienol                    | dow<br>n | 2.0<br>55<br>3 | 0.6306 | 0.01<br>791       | 0.10<br>13  | 3.344±<br>1.71   | 5.303±0.<br>5819 |
| 13-Hydroxy-9-methoxy-10-oxo-11-octadecenoic acid | dow<br>n | 2.0<br>46      | 0.7825 | 0.00<br>051<br>74 | 0.02<br>694 | 5.097±<br>0.5863 | 6.514±0.<br>6573 |
| Cilomilast                                       | dow<br>n | 2.0<br>45<br>5 | 0.7764 | 0.00<br>414<br>2  | 0.03<br>118 | 4.271±<br>0.8134 | 5.501±0.<br>4095 |
| Milbemycin alpha10                               | dow<br>n | 2.0<br>43<br>2 | 0.739  | 0.00<br>029<br>94 | 0.02<br>694 | 3.984±<br>0.4154 | 5.391±0.<br>7761 |
| 9-OxoODE                                         | dow<br>n | 2.0<br>42      | 0.8033 | 0.00<br>156<br>1  | 0.03<br>888 | 5.241±<br>0.5484 | 6.524±0.<br>7662 |
| Etimicin                                         | dow<br>n | 2.0<br>35<br>2 | 0.7129 | 6.14<br>E-0<br>5  | 0.02<br>185 | 3.698±<br>0.5679 | 5.187±0.<br>3902 |
| 9,12,13-TriHOME                                  | dow<br>n | 2.0<br>34<br>6 | 0.8055 | 0.00<br>665<br>5  | 0.07<br>562 | 5.59±0.<br>6952  | 6.94±1.0<br>1    |
| 12-OPDA                                          | dow<br>n | 2.0<br>34<br>2 | 0.8169 | 0.00<br>212<br>2  | 0.04<br>594 | 5.564±<br>0.3749 | 6.811±0.<br>9503 |
| Lys Leu Ile                                      | dow      | 2.0            | 0.7695 | 0.00              | 0.02        | 4.519±           | 5.873±0.         |



|                                               |     |     |        |      |      |         |          |
|-----------------------------------------------|-----|-----|--------|------|------|---------|----------|
|                                               | n   | 30  |        | 010  | 375  | 0.3459  | 6784     |
|                                               |     | 2   |        | 47   |      |         |          |
| Val Gly Val                                   | dow | 2.0 | 0.7543 | 0.00 | 0.04 | 4.267±  | 5.657±0. |
|                                               | n   | 19  |        | 243  | 763  | 0.8822  | 3013     |
|                                               |     | 3   |        | 8    |      |         |          |
| Thr-Leu                                       | dow | 2.0 | 0.7589 | 0.00 | 0.02 | 4.072±  | 5.366±0. |
|                                               | n   | 15  |        | 199  | 589  | 0.6506  | 6808     |
|                                               |     | 9   |        | 8    |      |         |          |
| L-Aspartyl-L-Phenylalanine                    | dow | 2.0 | 0.7971 | 0.01 | 0.05 | 4.44±0. | 5.57±0.2 |
|                                               | n   | 14  |        | 425  | 573  | 9589    | 427      |
|                                               |     | 6   |        |      |      |         |          |
| 13(S)-HOTrE                                   | dow | 2.0 | 0.8322 | 0.00 | 0.03 | 5.976±  | 7.181±0. |
|                                               | n   | 04  |        | 161  | 888  | 0.337   | 8947     |
|                                               |     | 3   |        | 4    |      |         |          |
| PGP(22:6(4Z,7Z,10Z,13Z,16Z,19Z)/5-iso PGF2VI) | dow | 2.0 | 0.7383 | 0.02 | 0.10 | 4.206±  | 5.697±0. |
|                                               | n   | 02  |        | 272  | 81   | 1.389   | 3073     |
|                                               |     | 4   |        |      |      |         |          |
| Avocadyne 1-acetate                           | dow | 1.9 | 0.844  | 6.36 | 0.02 | 6.14±0. | 7.275±0. |
|                                               | n   | 71  |        | E-0  | 185  | 32      | 4941     |
|                                               |     | 2   |        | 5    |      |         |          |
| Anhydrocinnzeylanine                          | dow | 1.9 | 0.7738 | 0.02 | 0.10 | 5.008±  | 6.472±0. |
|                                               | n   | 7   |        | 039  | 5    | 1.261   | 6541     |
| Corchorifatty acid F                          | dow | 1.9 | 0.8161 | 0.00 | 0.03 | 5.441±  | 6.667±0. |
|                                               | n   | 64  |        | 470  | 318  | 0.5352  | 9405     |
|                                               |     | 6   |        | 4    |      |         |          |
| 2-Cyclohexylidencyclohexanone                 | dow | 1.9 | 0.7185 | 0.01 | 0.08 | 3.598±  | 5.008±1. |

|                                                      |          |                |        |                  |             |                  |                  |
|------------------------------------------------------|----------|----------------|--------|------------------|-------------|------------------|------------------|
|                                                      | n        | 62<br>8        |        | 126              | 91          | 0.7203           | 233              |
| 14,15-DiHETrE                                        | dow<br>n | 1.9<br>56<br>4 | 0.8248 | 0.00<br>710<br>6 | 0.03<br>982 | 4.75±0.<br>5654  | 5.759±0.<br>7094 |
| N-(p-Hydroxyphenethyl)actinidine                     | dow<br>n | 1.9<br>49<br>8 | 0.7075 | 0.00<br>218      | 0.04<br>61  | 3.425±<br>0.8755 | 4.841±0.<br>3508 |
| Leu Glu Gly                                          | dow<br>n | 1.9<br>43<br>8 | 0.7913 | 0.00<br>101<br>2 | 0.03<br>501 | 4.581±<br>0.6236 | 5.789±0.<br>4428 |
| Arg-3-hyp-7-phe-bradykinin                           | dow<br>n | 1.9<br>43<br>5 | 0.5795 | 0.03<br>344      | 0.12<br>33  | 2.88±2.<br>064   | 4.97±0.7<br>584  |
| Val His Ile                                          | dow<br>n | 1.9<br>40<br>2 | 0.7941 | 0.00<br>223<br>8 | 0.04<br>613 | 4.475±<br>0.5327 | 5.635±0.<br>7104 |
| Ligusticide                                          | dow<br>n | 1.9<br>37<br>9 | 0.7266 | 0.00<br>905<br>9 | 0.08<br>354 | 3.538±<br>0.5044 | 4.869±1.<br>255  |
| 4,4alpha,5,6-Tetrahydro-7-methyl-2(3H)-naphthalenone | dow<br>n | 1.9<br>34<br>7 | 0.7142 | 0.00<br>804<br>7 | 0.08<br>09  | 3.641±<br>1.061  | 5.098±0.<br>5609 |
| Trimethobenzamide                                    | dow<br>n | 1.9<br>34<br>2 | 0.726  | 0.00<br>658      | 0.07<br>555 | 3.94±1.<br>072   | 5.427±0.<br>4649 |

|                      |          |                |        |                   |             |                  |                  |
|----------------------|----------|----------------|--------|-------------------|-------------|------------------|------------------|
| Biocytin             | dow<br>n | 1.9<br>30<br>1 | 0.8101 | 0.00<br>638<br>1  | 0.07<br>43  | 4.483±<br>0.6778 | 5.534±0.<br>5504 |
| Dethiobiotin         | dow<br>n | 1.9<br>28      | 0.7403 | 0.00<br>260<br>6  | 0.02<br>67  | 4.017±<br>0.6626 | 5.426±0.<br>8779 |
| Ile Glu Ser          | dow<br>n | 1.9<br>26<br>3 | 0.7545 | 0.00<br>032<br>56 | 0.02<br>694 | 4.124±<br>0.5189 | 5.466±0.<br>6013 |
| Kifunensine          | dow<br>n | 1.9<br>15<br>7 | 0.7531 | 0.01<br>248       | 0.09<br>18  | 3.487±<br>0.6533 | 4.63±0.9<br>503  |
| Sinomenine           | dow<br>n | 1.9<br>15<br>1 | 0.8135 | 0.01<br>039       | 0.04<br>662 | 4.721±<br>0.839  | 5.803±0.<br>3731 |
| Glycyl-Phenylalanine | dow<br>n | 1.9<br>14<br>4 | 0.7818 | 0.00<br>387       | 0.03<br>073 | 4.024±<br>0.7323 | 5.147±0.<br>3806 |
| Ile Pro Ile          | dow<br>n | 1.9<br>13<br>7 | 0.7622 | 0.00<br>913<br>2  | 0.08<br>365 | 4.326±<br>1.068  | 5.676±0.<br>2001 |
| Elaidic Acid         | dow<br>n | 1.9<br>13<br>6 | 0.8055 | 0.00<br>141<br>2  | 0.02<br>421 | 3.942±<br>0.5471 | 4.894±0.<br>2578 |
| THYMOPENTIN          | dow<br>n | 1.9<br>13      | 0.706  | 0.02<br>793       | 0.11<br>63  | 3.41±1.<br>328   | 4.83±0.5<br>935  |

|                                                                                    |          |                |        |                   |             |                  |                  |
|------------------------------------------------------------------------------------|----------|----------------|--------|-------------------|-------------|------------------|------------------|
|                                                                                    |          | 4              |        |                   |             |                  |                  |
| Bolasterone                                                                        | dow<br>n | 1.9<br>13<br>2 | 0.7711 | 0.00<br>866<br>5  | 0.04<br>231 | 3.814±<br>0.6283 | 4.946±0.<br>8588 |
| Ala Val Ile                                                                        | dow<br>n | 1.9<br>12<br>2 | 0.786  | 0.00<br>430<br>5  | 0.06<br>246 | 4.547±<br>0.7149 | 5.785±0.<br>6857 |
| Humilixanthin                                                                      | dow<br>n | 1.8<br>98<br>5 | 0.7966 | 0.00<br>151<br>7  | 0.03<br>888 | 4.093±<br>0.6071 | 5.138±0.<br>2826 |
| ALANYL-dl-LEUCINE                                                                  | dow<br>n | 1.8<br>88<br>8 | 0.7935 | 0.00<br>668<br>7  | 0.03<br>865 | 4.658±<br>0.7655 | 5.87±0.6<br>87   |
| 3,5-Dichloro-2,6-dihydroxybenzoic acid                                             | up       | 1.8<br>88<br>8 | 1.2746 | 0.00<br>578<br>7  | 0.03<br>58  | 5.848±<br>0.4425 | 4.588±1.<br>106  |
| Thr Asp Phe                                                                        | dow<br>n | 1.8<br>88<br>7 | 0.7795 | 0.00<br>039<br>96 | 0.02<br>694 | 4.077±<br>0.5849 | 5.23±0.1<br>978  |
| Arg Leu                                                                            | dow<br>n | 1.8<br>87<br>5 | 0.8277 | 0.00<br>038       | 0.02<br>694 | 5.265±<br>0.4514 | 6.361±0.<br>4665 |
| N-(N-(3-Amino-3-carboxypropyl)-3-amino-3-carboxypropyl)azetidine-2-carboxylic acid | dow<br>n | 1.8<br>87<br>4 | 0.7294 | 0.00<br>178<br>9  | 0.02<br>486 | 3.661±<br>0.7381 | 5.019±0.<br>5743 |
| Kukoamine D                                                                        | dow      | 1.8            | 0.6929 | 0.03              | 0.12        | 3.913±           | 5.647±0.         |

|                                          |          |                |        |                   |             |                  |                  |
|------------------------------------------|----------|----------------|--------|-------------------|-------------|------------------|------------------|
|                                          | n        | 84<br>1        |        | 474               | 51          | 1.768            | 3802             |
| 9,10,13-TriHOME                          | dow<br>n | 1.8<br>82<br>2 | 0.8514 | 0.00<br>422<br>5  | 0.03<br>139 | 6.297±<br>0.5036 | 7.396±0.<br>7954 |
| PIP(18:1(12Z)-O(9S,10R)/20:1(11Z))       | dow<br>n | 1.8<br>79<br>2 | 0.75   | 0.00<br>059<br>38 | 0.02<br>75  | 3.958±<br>0.7011 | 5.277±0.<br>2337 |
| Serylisoleucine                          | dow<br>n | 1.8<br>71<br>8 | 0.7796 | 0.00<br>390<br>1  | 0.03<br>073 | 4.202±<br>0.6904 | 5.39±0.6<br>216  |
| Astacin                                  | dow<br>n | 1.8<br>68<br>2 | 0.722  | 0.01<br>329       | 0.09<br>374 | 4.057±<br>1.221  | 5.619±0.<br>7138 |
| Ala Val Thr                              | dow<br>n | 1.8<br>67<br>8 | 0.7944 | 0.00<br>939<br>7  | 0.08<br>416 | 4.603±<br>0.9192 | 5.794±0.<br>3536 |
| 1,2-Dihydroxy-3-keto-5-methylthiopentene | dow<br>n | 1.8<br>33      | 0.7602 | 0.01<br>331       | 0.09<br>374 | 3.494±<br>0.5071 | 4.596±1.<br>062  |
| Ile Ile                                  | dow<br>n | 1.8<br>31<br>3 | 0.7521 | 0.01<br>774       | 0.10<br>07  | 4.169±<br>1.156  | 5.543±0.<br>5843 |
| Asparaginylnl-Phenylalanine              | dow<br>n | 1.8<br>25<br>6 | 0.7745 | 0.02              | 0.06<br>396 | 4.139±<br>0.7615 | 5.344±1.<br>082  |
| Ile Gly Leu                              | dow      | 1.8            | 0.7298 | 0.02              | 0.10        | 3.473±           | 4.759±1.         |

|                                          |          |                |        |                  |             |                  |                  |
|------------------------------------------|----------|----------------|--------|------------------|-------------|------------------|------------------|
|                                          | n        | 14             |        | 409              | 95          | 0.8671           | 167              |
| Kinetensin 1-8                           | dow<br>n | 1.8<br>11<br>4 | 0.7718 | 0.00<br>36       | 0.05<br>911 | 4.146±<br>0.6243 | 5.372±0.<br>7706 |
| 12-Hydroxyheptadeca-5,8,10-trienoic acid | dow<br>n | 1.8<br>06      | 0.8009 | 0.03<br>384      | 0.12<br>42  | 4.388±<br>0.9651 | 5.479±0.<br>7642 |
| (R)-Laudanidine                          | dow<br>n | 1.8<br>02<br>5 | 0.8303 | 0.00<br>291<br>4 | 0.02<br>751 | 4.609±<br>0.5296 | 5.551±0.<br>4638 |
| Asn Phe                                  | dow<br>n | 1.7<br>96<br>6 | 0.727  | 0.02<br>793      | 0.11<br>63  | 4.147±<br>1.434  | 5.704±0.<br>7325 |
| Val Val                                  | dow<br>n | 1.7<br>92<br>9 | 0.7963 | 0.01<br>931      | 0.10<br>35  | 4.668±<br>0.9507 | 5.862±0.<br>7191 |
| Arabinofuranosylguanine                  | dow<br>n | 1.7<br>86<br>4 | 0.8443 | 0.03<br>862      | 0.08<br>967 | 5.033±<br>0.8594 | 5.961±0.<br>6379 |
| 9(S)-HpOTrE                              | dow<br>n | 1.7<br>71<br>7 | 0.8467 | 0.00<br>557<br>6 | 0.03<br>517 | 5.646±<br>0.2702 | 6.668±0.<br>9454 |
| 9(S)-HpODE                               | dow<br>n | 1.7<br>69      | 0.853  | 0.00<br>258<br>1 | 0.02<br>67  | 6.087±<br>0.3442 | 7.136±0.<br>8064 |
| 4-ene-Valproic acid                      | dow<br>n | 1.7<br>67      | 0.8303 | 0.00<br>115      | 0.02<br>392 | 5.134±<br>0.3915 | 6.183±0.<br>6499 |

|                                |          |                |        |                   |             |                  |                  |
|--------------------------------|----------|----------------|--------|-------------------|-------------|------------------|------------------|
|                                |          |                |        | 3                 |             |                  |                  |
| Ser Ala Val Thr Ala            | dow<br>n | 1.7<br>58<br>7 | 0.8184 | 0.00<br>055<br>67 | 0.02<br>694 | 4.502±<br>0.4062 | 5.501±0.<br>4836 |
| Meclizine                      | dow<br>n | 1.7<br>57<br>9 | 0.8302 | 0.00<br>374<br>2  | 0.05<br>961 | 5.157±<br>0.7036 | 6.212±0.<br>2816 |
| D-Glucono-1,4-lactone          | up       | 1.7<br>57<br>9 | 1.2681 | 0.01<br>632       | 0.09<br>862 | 5.118±<br>0.8325 | 4.036±0.<br>6344 |
| Tryptophyl-Glutamine           | dow<br>n | 1.7<br>52      | 0.8088 | 0.01<br>456       | 0.09<br>575 | 4.365±<br>0.6687 | 5.397±0.<br>7965 |
| 8-Epi pgf1 alpha               | dow<br>n | 1.7<br>48<br>6 | 0.7814 | 0.04<br>668       | 0.10<br>02  | 4.026±<br>0.7803 | 5.152±1.<br>304  |
| Cinnassiol D3                  | dow<br>n | 1.7<br>42<br>7 | 0.6891 | 0.00<br>756<br>8  | 0.04<br>029 | 3.403±<br>0.9657 | 4.938±0.<br>9306 |
| (2-Naphthalenyloxy)acetic acid | dow<br>n | 1.7<br>40<br>7 | 0.8108 | 0.02<br>494       | 0.11<br>06  | 4.238±<br>0.3118 | 5.227±1.<br>206  |
| Nopalinic acid                 | dow<br>n | 1.7<br>34<br>4 | 0.8252 | 0.00<br>830<br>5  | 0.08<br>249 | 4.943±<br>0.7843 | 5.99±0.3<br>346  |
| Thromboxane B2                 | dow<br>n | 1.7<br>27      | 0.7836 | 0.00<br>294       | 0.05<br>326 | 3.671±<br>0.5571 | 4.685±0.<br>5275 |

|                                                            |          |                |        |                  |             |                  |                  |
|------------------------------------------------------------|----------|----------------|--------|------------------|-------------|------------------|------------------|
|                                                            |          | 3              |        | 6                |             |                  |                  |
| Citramide                                                  | up       | 1.7<br>25<br>4 | 1.2449 | 0.00<br>515<br>8 | 0.03<br>438 | 5.175±<br>0.5356 | 4.157±0.<br>6906 |
| 5-Hydroxy-L-tryptophan                                     | dow<br>n | 1.7<br>24<br>3 | 0.8519 | 0.00<br>482<br>7 | 0.06<br>534 | 5.246±<br>0.3241 | 6.158±0.<br>769  |
| Dihydrojasmone                                             | dow<br>n | 1.7<br>21      | 0.7686 | 0.01<br>983      | 0.10<br>44  | 3.69±0.<br>6183  | 4.801±1.<br>09   |
| (R)-2-Hydroxysterculic acid                                | dow<br>n | 1.7<br>10<br>9 | 0.8375 | 0.01<br>157      | 0.08<br>977 | 5.395±<br>0.8643 | 6.442±0.<br>1487 |
| 4-Ethyl-7,11-dimethyldodeca-trans-2-trans-6-1-o-trien-1-al | up       | 1.7<br>09<br>6 | 1.2658 | 0.00<br>669      | 0.07<br>562 | 5.072±<br>0.3162 | 4.007±0.<br>9999 |
| Tyr Leu                                                    | dow<br>n | 1.7<br>06<br>9 | 0.8237 | 0.00<br>342<br>2 | 0.05<br>804 | 4.593±<br>0.6269 | 5.576±0.<br>3368 |
| Lys Ile Leu                                                | dow<br>n | 1.6<br>91      | 0.7839 | 0.00<br>249<br>7 | 0.04<br>856 | 4.32±0.<br>2771  | 5.511±0.<br>9818 |
| Isoleucyl-Serine                                           | dow<br>n | 1.6<br>90<br>4 | 0.8367 | 0.00<br>781<br>3 | 0.07<br>972 | 5.267±<br>0.6161 | 6.295±0.<br>6855 |
| Val Ala Leu                                                | dow<br>n | 1.6<br>88      | 0.759  | 0.04<br>485      | 0.13<br>99  | 4.138±<br>1.354  | 5.452±0.<br>6607 |



|                                            |          |                |        |                  |             |                  |                  |
|--------------------------------------------|----------|----------------|--------|------------------|-------------|------------------|------------------|
|                                            |          | 3              |        |                  |             |                  |                  |
| 3-O-Demethylfortimicin A                   | dow<br>n | 1.6<br>83<br>8 | 0.7217 | 0.01<br>541      | 0.09<br>757 | 3.84±1.<br>206   | 5.321±0.<br>639  |
| D-Glucosamine-6-phosphate                  | dow<br>n | 1.6<br>79<br>3 | 0.8341 | 0.02<br>293      | 0.06<br>825 | 4.237±<br>0.7636 | 5.08±0.3<br>056  |
| Sphinganine (C20)                          | up       | 1.6<br>73<br>5 | 1.2575 | 0.00<br>515<br>9 | 0.06<br>635 | 5.362±<br>0.7332 | 4.264±0.<br>4324 |
| LysoPC(P-18:1(9Z)/0:0)                     | dow<br>n | 1.6<br>68      | 0.8486 | 0.01<br>042      | 0.08<br>621 | 5.032±<br>0.7038 | 5.93±0.2<br>757  |
| Cimifugin                                  | up       | 1.6<br>6       | 1.1701 | 0.02<br>141      | 0.10<br>62  | 6.267±<br>0.533  | 5.356±0.<br>8877 |
| Pelargonidin 3-sophoroside                 | up       | 1.6<br>58<br>4 | 1.1448 | 0.01<br>969      | 0.10<br>44  | 7.188±<br>0.4146 | 6.279±0.<br>9715 |
| (6E)-8-hydroxygeraniol                     | dow<br>n | 1.6<br>55<br>4 | 0.7547 | 0.00<br>797<br>9 | 0.04<br>157 | 2.822±<br>0.3701 | 3.739±0.<br>8244 |
| PA(20:2(11Z,14Z)/22:5(7Z,10Z,13Z,16Z,19Z)) | dow<br>n | 1.6<br>53<br>5 | 0.7326 | 0.01<br>178      | 0.09<br>023 | 3.989±<br>1.009  | 5.445±0.<br>9087 |
| Dapta                                      | dow<br>n | 1.6<br>52<br>6 | 0.753  | 0.02<br>271      | 0.10<br>81  | 3.924±<br>1.113  | 5.211±0.<br>6505 |

|                                                                                            |          |                |        |                  |             |                  |                   |
|--------------------------------------------------------------------------------------------|----------|----------------|--------|------------------|-------------|------------------|-------------------|
| Val Asn Leu                                                                                | dow<br>n | 1.6<br>50<br>8 | 0.8031 | 0.00<br>384      | 0.05<br>996 | 4.324±<br>0.5359 | 5.384±0.<br>6841  |
| Lamprey gonadotropin-releasing hormone-I                                                   | dow<br>n | 1.6<br>49<br>9 | 0.7553 | 0.00<br>239<br>2 | 0.04<br>714 | 3.763±<br>0.6579 | 4.982±0.<br>6035  |
| CDP-DG(PGF1alpha/18:1(9Z))                                                                 | dow<br>n | 1.6<br>48<br>1 | 0.7397 | 0.01<br>431      | 0.09<br>539 | 3.444±<br>0.5982 | 4.656±1.<br>154   |
| 4-(2-((7-Amino-2-(furan-2-yl)-[1,2,4]triazolo[1,5-a][1,3,5]triazin-5-yl)amino)ethyl)phenol | dow<br>n | 1.6<br>47      | 0.7583 | 0.04<br>826      | 0.14<br>35  | 3.502±<br>0.9239 | 4.618±1.<br>12    |
| Acetylsoyasaponin A6                                                                       | dow<br>n | 1.6<br>42<br>7 | 0.8164 | 0.00<br>212<br>9 | 0.04<br>594 | 4.363±<br>0.6297 | 5.344±0.<br>06224 |
| 11(R)-HEDE                                                                                 | dow<br>n | 1.6<br>39<br>1 | 0.865  | 0.03<br>693      | 0.08<br>74  | 4.356±<br>0.6109 | 5.036±0.<br>4914  |
| Cholecystokinin (10-20)                                                                    | dow<br>n | 1.6<br>37<br>3 | 0.8065 | 0.00<br>414<br>7 | 0.06<br>179 | 4.156±<br>0.4881 | 5.153±0.<br>6797  |
| Corchorifatty acid A                                                                       | dow<br>n | 1.6<br>36<br>8 | 0.8493 | 0.02<br>239      | 0.10<br>81  | 5.195±<br>0.3175 | 6.117±1.<br>083   |
| Gln Asp Ile                                                                                | dow<br>n | 1.6<br>35<br>7 | 0.7669 | 0.03<br>564      | 0.12<br>68  | 4.432±<br>1.373  | 5.779±0.<br>3645  |

|                                   |          |                |        |                   |             |                  |                  |
|-----------------------------------|----------|----------------|--------|-------------------|-------------|------------------|------------------|
| His Met Arg                       | dow<br>n | 1.6<br>35<br>7 | 0.7665 | 0.01<br>229       | 0.09<br>142 | 3.909±<br>0.9062 | 5.1±0.57<br>13   |
| Metronidazole                     | up       | 1.6<br>14      | 1.2679 | 0.00<br>097<br>66 | 0.02<br>392 | 5.282±<br>0.3453 | 4.166±0.<br>737  |
| Glycohyocholic Acid               | dow<br>n | 1.6<br>09<br>4 | 0.7618 | 0.03<br>579       | 0.12<br>68  | 3.62±0.<br>9789  | 4.752±0.<br>8776 |
| L-Leucyl-L-Alanine                | dow<br>n | 1.6<br>05<br>2 | 0.8271 | 0.02<br>956       | 0.07<br>781 | 4.45±0.<br>7059  | 5.38±0.8<br>069  |
| PE(22:1/0:0)                      | dow<br>n | 1.6<br>04<br>6 | 0.8623 | 0.00<br>438<br>4  | 0.03<br>212 | 4.698±<br>0.4857 | 5.448±0.<br>2978 |
| (+)-Lysergic acid                 | up       | 1.6<br>01<br>9 | 1.2586 | 0.02<br>532       | 0.07<br>152 | 5.392±<br>0.5178 | 4.284±1.<br>254  |
| Mayzent                           | dow<br>n | 1.6<br>00<br>8 | 0.8001 | 0.00<br>996<br>1  | 0.08<br>518 | 4.48±0.<br>8096  | 5.599±0.<br>5505 |
| Phe Val                           | dow<br>n | 1.5<br>99<br>3 | 0.8113 | 0.02<br>21        | 0.10<br>78  | 4.532±<br>0.937  | 5.586±0.<br>4265 |
| L-cis-Cyclo(aspartylphenylalanyl) | dow<br>n | 1.5<br>97      | 0.8486 | 0.00<br>287       | 0.05<br>247 | 4.766±<br>0.5023 | 5.616±0.<br>3605 |

|                                                                                              |          |                |        |                  |             |                  |                  |
|----------------------------------------------------------------------------------------------|----------|----------------|--------|------------------|-------------|------------------|------------------|
|                                                                                              |          | 2              |        | 3                |             |                  |                  |
| (Z)-7-[(1R,2R,3R,5S)-2-(1,2-Dihydroxy-3-oxooctyl)-3,5-dihydroxycyclopentyl]hept-5-enoic acid | dow<br>n | 1.5<br>92<br>7 | 0.8105 | 0.01<br>611      | 0.05<br>842 | 4.487±<br>0.7914 | 5.536±0.<br>6457 |
| N-Carbamoylsarcosine                                                                         | dow<br>n | 1.5<br>89<br>8 | 0.8006 | 0.00<br>692<br>7 | 0.03<br>941 | 4.204±<br>0.6022 | 5.251±0.<br>7054 |
| Epothilone D                                                                                 | dow<br>n | 1.5<br>85<br>5 | 0.5707 | 0.02<br>315      | 0.10<br>85  | 2.183±<br>1.498  | 3.825±0.<br>5644 |
| Monic acid                                                                                   | dow<br>n | 1.5<br>83      | 0.8248 | 0.02<br>22       | 0.10<br>78  | 4.083±<br>0.1286 | 4.95±1.0<br>79   |
| LysoPC(14:0/0:0)                                                                             | dow<br>n | 1.5<br>81<br>2 | 0.8217 | 0.01<br>984      | 0.10<br>44  | 4.416±<br>0.815  | 5.374±0.<br>4477 |
| Alpha-Cyperol                                                                                | dow<br>n | 1.5<br>76<br>1 | 0.7057 | 0.01<br>368      | 0.09<br>395 | 2.643±<br>0.8083 | 3.745±0.<br>6543 |
| 1-Stearoylglycerophosphoglycerol                                                             | up       | 1.5<br>76      | 1.1962 | 0.04<br>404      | 0.09<br>675 | 5.919±<br>0.2945 | 4.948±1.<br>365  |
| (+)-Erysotrine                                                                               | dow<br>n | 1.5<br>72      | 0.8152 | 0.00<br>216<br>2 | 0.04<br>61  | 3.939±<br>0.2925 | 4.832±0.<br>6649 |
| Pro Asn Leu                                                                                  | dow<br>n | 1.5<br>71<br>8 | 0.8287 | 0.02<br>123      | 0.10<br>59  | 4.606±<br>0.8809 | 5.558±0.<br>1337 |

|                                                  |          |                |        |                  |             |                  |                  |
|--------------------------------------------------|----------|----------------|--------|------------------|-------------|------------------|------------------|
| Araloside S1                                     | dow<br>n | 1.5<br>69<br>2 | 0.7943 | 0.00<br>927<br>5 | 0.08<br>416 | 4.322±<br>0.5792 | 5.441±0.<br>9179 |
| Protodegalactotigonin                            | dow<br>n | 1.5<br>67<br>3 | 0.8482 | 0.00<br>121<br>5 | 0.03<br>596 | 4.431±<br>0.4508 | 5.224±0.<br>1957 |
| D-Glycerate 2-phosphate                          | up       | 1.5<br>67<br>1 | 1.1623 | 0.00<br>844<br>5 | 0.04<br>163 | 5.752±<br>0.375  | 4.949±0.<br>6838 |
| 11(S)-HEDE                                       | dow<br>n | 1.5<br>66<br>7 | 0.779  | 0.01<br>06       | 0.04<br>717 | 3.866±<br>0.6251 | 4.963±0.<br>8672 |
| 4-(2,6,6-Trimethyl-1-cyclohexenyl)-2-butanol     | up       | 1.5<br>65<br>5 | 1.1871 | 0.01<br>388      | 0.05<br>543 | 4.923±<br>0.1892 | 4.147±0.<br>858  |
| Pro Asp Phe                                      | dow<br>n | 1.5<br>65<br>2 | 0.8328 | 0.01<br>684      | 0.09<br>989 | 4.263±<br>0.7421 | 5.119±0.<br>2341 |
| 7-Isopropyl-5-methylbicyclo[2.2.2]oct-5-en-2-one | dow<br>n | 1.5<br>55<br>1 | 0.8235 | 0.01<br>348      | 0.09<br>379 | 4.058±<br>0.3846 | 4.928±0.<br>8544 |
| N-Acetyl-DL-Aspartic Acid                        | dow<br>n | 1.5<br>50<br>1 | 0.8841 | 0.00<br>839<br>8 | 0.04<br>163 | 5.301±<br>0.5263 | 5.996±0.<br>2034 |
| Tyrosyl-Valine                                   | dow<br>n | 1.5<br>48      | 0.8682 | 0.00<br>254      | 0.04<br>882 | 5.705±<br>0.4763 | 6.571±0.<br>4218 |

|                                                                                      |      |                |        |                  |             |                  |                  |
|--------------------------------------------------------------------------------------|------|----------------|--------|------------------|-------------|------------------|------------------|
|                                                                                      |      | 8              |        | 6                |             |                  |                  |
| (2S,3S,4R,5R)-5-(6-Aminopurin-9-yl)-N-cyclopropyl-3,4-dihydroxyoxolane-2-carboxamide | down | 1.5<br>47<br>2 | 0.8398 | 0.00<br>779<br>4 | 0.07<br>971 | 4.219±<br>0.5019 | 5.024±0.<br>5033 |
| Arachidyl carnitine                                                                  | up   | 1.5<br>41<br>2 | 1.2141 | 0.02<br>367      | 0.10<br>88  | 6.318±<br>0.6336 | 5.204±1.<br>139  |
| (3R)-3-Hydroxy-N-[(3S)-2-oxoxolan-3-yl]butanamide                                    | down | 1.5<br>35<br>6 | 0.8224 | 0.02<br>202      | 0.06<br>709 | 3.562±<br>0.2249 | 4.331±0.<br>9205 |
| Midodrine                                                                            | up   | 1.5<br>35<br>3 | 1.2809 | 0.01<br>126      | 0.08<br>91  | 5.896±<br>0.6258 | 4.603±1.<br>167  |
| Glycylvaline                                                                         | down | 1.5<br>28<br>5 | 0.7892 | 0.01<br>406      | 0.09<br>483 | 4.459±<br>0.8557 | 5.65±0.7<br>579  |
| 5alpha-Androstane-3beta,7alpha,17beta-triol                                          | down | 1.5<br>26<br>2 | 0.8106 | 0.04<br>437      | 0.13<br>94  | 5.787±<br>1.442  | 7.139±0.<br>436  |
| Glycerylphosphorylcholine                                                            | down | 1.5<br>24<br>4 | 0.8801 | 0.02<br>496      | 0.07<br>107 | 5.351±<br>0.6903 | 6.08±0.1<br>686  |
| Isokobusone                                                                          | down | 1.5<br>22<br>9 | 0.8274 | 0.00<br>832<br>9 | 0.08<br>251 | 4.362±<br>0.5373 | 5.272±0.<br>6363 |
| Phenol sulphate                                                                      | up   | 1.5            | 1.1578 | 0.04             | 0.09        | 5.68±0.          | 4.906±0.         |

|                                                                                                                                                     |          |                |        |                  |             |                  |                  |
|-----------------------------------------------------------------------------------------------------------------------------------------------------|----------|----------------|--------|------------------|-------------|------------------|------------------|
|                                                                                                                                                     |          | 22<br>4        |        | 051              | 243         | 7235             | 5403             |
| (3b,6a,12b,17a,20S)-Dammar-24-ene-3,6,12,17,20-pentol<br>20-[glucosyl-(1->2)-[rhamnosyl-(1->6)]-glucoside] 3-[glucosyl-(1->6)-glucoside] 6-xyloside | dow<br>n | 1.5<br>21<br>8 | 0.8364 | 0.00<br>64       | 0.07<br>431 | 5.027±<br>0.5602 | 6.01±0.6<br>523  |
| Asparaginyln-Proline                                                                                                                                | dow<br>n | 1.5<br>18<br>2 | 0.8534 | 0.02<br>063      | 0.06<br>471 | 4.478±<br>0.5405 | 5.247±0.<br>6205 |
| 3-Carboxy-4-Methyl-5-Propyl-2-Furanpropanoic Acid                                                                                                   | up       | 1.5<br>16<br>3 | 1.2375 | 0.00<br>951<br>5 | 0.04<br>395 | 5.174±<br>0.534  | 4.181±0.<br>797  |
| Met Phe                                                                                                                                             | dow<br>n | 1.5<br>12<br>3 | 0.7927 | 0.02<br>712      | 0.11<br>5   | 4.145±<br>0.6745 | 5.229±1.<br>097  |
| 14-(Hydroxymethyl)-5,9-dimethyltetracyclo[11.2.1.0~1,10~.0~4,9~]hexadecan-5-ol                                                                      | dow<br>n | 1.5<br>10<br>3 | 0.8473 | 0.00<br>301<br>8 | 0.05<br>38  | 4.583±<br>0.3624 | 5.409±0.<br>5684 |
| Riboprine                                                                                                                                           | dow<br>n | 1.5<br>08<br>5 | 0.8443 | 0.04<br>25       | 0.13<br>72  | 4.397±<br>0.7879 | 5.208±0.<br>52   |
| 13Z-Docosenamide                                                                                                                                    | up       | 1.5<br>06<br>3 | 1.1586 | 0.00<br>128      | 0.03<br>677 | 6.106±<br>0.2849 | 5.27±0.5<br>563  |
| Hordatine A glucoside                                                                                                                               | dow<br>n | 1.5<br>02<br>8 | 0.8164 | 0.01<br>509      | 0.09<br>708 | 4.563±<br>0.8785 | 5.589±0.<br>228  |

|                    |          |                |        |                  |             |                  |                  |
|--------------------|----------|----------------|--------|------------------|-------------|------------------|------------------|
| N-Nonanoylglycine  | dow<br>n | 1.4<br>96<br>9 | 0.8152 | 0.04<br>294      | 0.13<br>78  | 4.174±<br>1.008  | 5.12±0.2<br>636  |
| Morph              | dow<br>n | 1.4<br>89<br>2 | 0.8486 | 0.01<br>935      | 0.10<br>35  | 5.028±<br>0.7156 | 5.925±0.<br>5385 |
| Threonylisoleucine | dow<br>n | 1.4<br>87<br>7 | 0.8479 | 0.00<br>292<br>2 | 0.05<br>306 | 4.472±<br>0.2885 | 5.274±0.<br>6099 |
| Naxagolide         | up       | 1.4<br>83<br>5 | 1.2137 | 0.01<br>035      | 0.08<br>617 | 4.442±<br>0.1687 | 3.66±0.8<br>261  |
| Phe Phe            | dow<br>n | 1.4<br>82<br>2 | 0.8308 | 0.01<br>858      | 0.10<br>23  | 4.374±<br>0.6435 | 5.265±0.<br>6566 |
| LysoPE(20:0/0:0)   | dow<br>n | 1.4<br>80<br>8 | 0.8884 | 0.04<br>887      | 0.10<br>29  | 5.575±<br>0.7598 | 6.275±0.<br>2567 |
| Lycopersiconolide  | dow<br>n | 1.4<br>80<br>6 | 0.8764 | 0.00<br>923      | 0.04<br>347 | 4.99±0.<br>4981  | 5.694±0.<br>3531 |
| N-acetylaspartate  | dow<br>n | 1.4<br>71<br>7 | 0.89   | 0.02<br>939      | 0.07<br>751 | 5.569±<br>0.6704 | 6.257±0.<br>1893 |
| Dmap-ethyl-paf     | up       | 1.4<br>70      | 1.2081 | 0.01<br>579      | 0.09<br>835 | 5.851±<br>0.5761 | 4.843±0.<br>9046 |



|                                                                  |          |                |        |                   |             |                  |                  |
|------------------------------------------------------------------|----------|----------------|--------|-------------------|-------------|------------------|------------------|
|                                                                  |          | 2              |        |                   |             |                  |                  |
| N'-nitrosoanabasine                                              | up       | 1.4<br>67<br>9 | 1.1643 | 0.00<br>085<br>38 | 0.02<br>392 | 4.889±<br>0.1118 | 4.199±0.<br>5083 |
| Glu Ile Leu                                                      | dow<br>n | 1.4<br>67<br>4 | 0.7311 | 0.04<br>589       | 0.14<br>04  | 3.905±<br>1.506  | 5.341±0.<br>6534 |
| PA(22:6(5Z,8E,10Z,13Z,15E,19Z)-2OH(7S, 17S)/18:4(6Z,9Z,12Z,15Z)) | dow<br>n | 1.4<br>65<br>9 | 0.8281 | 0.00<br>124<br>4  | 0.03<br>637 | 4.722±<br>0.2473 | 5.702±0.<br>7144 |
| Methyl-[12]-gingerdiol                                           | dow<br>n | 1.4<br>63<br>1 | 0.8503 | 0.03<br>351       | 0.08<br>301 | 4.395±<br>0.681  | 5.169±0.<br>5447 |
| Homo-L-arginine                                                  | dow<br>n | 1.4<br>62<br>3 | 0.869  | 0.00<br>518<br>9  | 0.06<br>635 | 4.572±<br>0.4707 | 5.261±0.<br>2393 |
| Blumealactone C                                                  | dow<br>n | 1.4<br>60<br>6 | 0.8069 | 0.02<br>437       | 0.10<br>95  | 3.886±<br>0.6286 | 4.816±0.<br>8443 |
| PE(P-16:0/16:0)                                                  | up       | 1.4<br>58<br>4 | 1.1503 | 0.00<br>097<br>25 | 0.03<br>501 | 6.283±<br>0.2776 | 5.462±0.<br>5211 |
| 2,3-Dimethyl-2-cyclohexen-1-one                                  | up       | 1.4<br>47<br>4 | 1.282  | 0.01<br>159       | 0.08<br>977 | 4.06±0.<br>6042  | 3.167±0.<br>5813 |
| Alpha-Dimorphecolic acid                                         | dow      | 1.4            | 0.9071 | 0.00              | 0.02        | 6.33±0.          | 6.978±0.         |

|                                                 |     |     |        |      |      |        |          |
|-------------------------------------------------|-----|-----|--------|------|------|--------|----------|
|                                                 | n   | 43  |        | 241  | 67   | 1761   | 5167     |
|                                                 |     | 3   |        | 7    |      |        |          |
| Subaphylline                                    | dow | 1.4 | 0.833  | 0.00 | 0.04 | 4.016± | 4.821±0. |
|                                                 | n   | 41  |        | 193  | 33   | 0.4703 | 2693     |
|                                                 |     | 4   |        | 3    |      |        |          |
| Ile Leu                                         | dow | 1.4 | 0.8719 | 0.01 | 0.09 | 5.276± | 6.051±0. |
|                                                 | n   | 40  |        | 456  | 575  | 0.5458 | 5252     |
|                                                 |     | 9   |        |      |      |        |          |
| Neurotensin 1-10                                | up  | 1.4 | 1.1994 | 0.01 | 0.10 | 5.142± | 4.287±0. |
|                                                 |     | 39  |        | 911  | 29   | 0.5502 | 7429     |
|                                                 |     | 5   |        |      |      |        |          |
| Dinoterb                                        | up  | 1.4 | 1.1267 | 0.00 | 0.02 | 5.435± | 4.824±0. |
|                                                 |     | 39  |        | 095  | 392  | 0.119  | 448      |
|                                                 |     |     |        | 85   |      |        |          |
| Cyclopentolate                                  | dow | 1.4 | 0.8465 | 0.00 | 0.06 | 4.567± | 5.395±0. |
|                                                 | n   | 38  |        | 459  | 395  | 0.5555 | 28       |
|                                                 |     | 5   |        | 1    |      |        |          |
| PC(2:0/22:6(4Z,7Z,11E,13Z,15E,19Z)-2OH(10S,17)) | dow | 1.4 | 0.8227 | 0.03 | 0.12 | 3.897± | 4.737±0. |
|                                                 | n   | 37  |        | 335  | 33   | 0.7623 | 5336     |
|                                                 |     | 5   |        |      |      |        |          |
| Imidazole-4-Acetic Acid                         | up  | 1.4 | 1.2134 | 0.03 | 0.12 | 4.612± | 3.801±0. |
|                                                 |     | 29  |        | 11   |      | 0.6904 | 5875     |
|                                                 |     | 4   |        |      |      |        |          |
| N-Nervonoyl Tryptophan                          | up  | 1.4 | 1.1349 | 0.00 | 0.03 | 6.454± | 5.687±0. |
|                                                 |     | 27  |        | 076  | 03   | 0.2847 | 4375     |
|                                                 |     | 7   |        | 74   |      |        |          |

|                                            |          |                |        |                  |             |                  |                  |
|--------------------------------------------|----------|----------------|--------|------------------|-------------|------------------|------------------|
| Leucyl-Aspartate                           | dow<br>n | 1.4<br>25<br>3 | 0.8126 | 0.03<br>96       | 0.09<br>121 | 4.461±<br>0.7282 | 5.49±1.0<br>97   |
| Ganglioside GD3 (d18:0/18:1(9Z))           | dow<br>n | 1.4<br>23<br>4 | 0.8628 | 0.02<br>014      | 0.10<br>49  | 4.992±<br>0.5274 | 5.786±0.<br>6788 |
| Phe Leu                                    | dow<br>n | 1.4<br>23<br>2 | 0.857  | 0.00<br>866<br>7 | 0.08<br>251 | 4.829±<br>0.4419 | 5.635±0.<br>6187 |
| Ser Leu Val Asn Ala                        | dow<br>n | 1.4<br>18<br>4 | 0.8107 | 0.01<br>182      | 0.09<br>023 | 4.481±<br>0.6661 | 5.527±0.<br>7576 |
| Biliverdin                                 | up       | 1.4<br>14<br>5 | 1.1347 | 0.02<br>062      | 0.10<br>53  | 5.906±<br>0.2674 | 5.205±0.<br>7944 |
| Glucosamine                                | dow<br>n | 1.4<br>12<br>8 | 0.911  | 0.01<br>118      | 0.04<br>862 | 5.853±<br>0.4552 | 6.425±0.<br>1735 |
| 2-Aminoacrylic acid                        | dow<br>n | 1.4<br>09<br>8 | 0.8651 | 0.02<br>508      | 0.07<br>107 | 4.426±<br>0.5494 | 5.116±0.<br>5004 |
| 4-(Glutamylamino) butanoate                | dow<br>n | 1.4<br>06<br>2 | 0.8608 | 0.04<br>41       | 0.13<br>94  | 5.354±<br>0.8924 | 6.22±0.4<br>205  |
| PA(20:4(8Z,11Z,14Z,17Z)-2OH(5S,6R)/P-16:0) | up       | 1.4<br>05      | 1.2217 | 0.02<br>958      | 0.11<br>76  | 4.745±<br>0.7031 | 3.884±0.<br>6617 |

|                                               |          |                |        |                   |             |                  |                  |
|-----------------------------------------------|----------|----------------|--------|-------------------|-------------|------------------|------------------|
|                                               |          | 3              |        |                   |             |                  |                  |
| O-Aminoazotoluene                             | dow<br>n | 1.4<br>04      | 0.7766 | 0.03<br>859       | 0.13<br>03  | 3.177±<br>0.6744 | 4.091±0.<br>9307 |
| Allylestrenol                                 | dow<br>n | 1.4<br>02<br>7 | 0.8634 | 0.03<br>577       | 0.08<br>537 | 4.645±<br>0.5567 | 5.38±0.7<br>025  |
| Ser Val Val                                   | dow<br>n | 1.4<br>01<br>8 | 0.7515 | 0.03<br>866       | 0.13<br>03  | 3.704±<br>1.224  | 4.929±0.<br>5721 |
| (1R,2R,4S)-p-Menthane-1,2,8-triol 8-glucoside | up       | 1.4<br>00<br>1 | 1.1749 | 0.02<br>843       | 0.11<br>65  | 5.152±<br>0.4602 | 4.385±0.<br>8089 |
| Epioxylubimin                                 | dow<br>n | 1.3<br>94<br>6 | 0.8609 | 0.01<br>809       | 0.10<br>19  | 4.907±<br>0.69   | 5.7±0.25<br>86   |
| Tyr-ile-gly-ser-arg                           | dow<br>n | 1.3<br>92<br>6 | 0.7855 | 0.02<br>146       | 0.10<br>63  | 4.608±<br>0.9767 | 5.866±0.<br>8754 |
| N-Acetylserotonin                             | dow<br>n | 1.3<br>91<br>1 | 0.7961 | 0.00<br>045<br>51 | 0.02<br>694 | 3.12±0.<br>2471  | 3.919±0.<br>4631 |
| Guanidineacetic acid                          | dow<br>n | 1.3<br>89<br>5 | 0.8969 | 0.01<br>601       | 0.09<br>839 | 6.01±0.<br>5561  | 6.701±0.<br>3343 |
| Xi-3-Nonenoic acid                            | dow<br>n | 1.3<br>88      | 0.8977 | 0.01<br>999       | 0.10<br>48  | 5.88±0.<br>2374  | 6.55±0.7<br>637  |

|                                                 |          |                |        |                   |             |                  |                  |
|-------------------------------------------------|----------|----------------|--------|-------------------|-------------|------------------|------------------|
|                                                 |          | 5              |        |                   |             |                  |                  |
| N-Nervonoyl Valine                              | up       | 1.3<br>88      | 1.3162 | 0.03<br>886       | 0.09<br>011 | 4.354±<br>0.9667 | 3.308±0.<br>7263 |
| Histamine                                       | up       | 1.3<br>82<br>8 | 1.1215 | 0.01<br>893       | 0.10<br>29  | 6.122±<br>0.4014 | 5.459±0.<br>6055 |
| Asn Ala Glu Val Leu                             | dow<br>n | 1.3<br>82<br>2 | 0.8799 | 0.01<br>742       | 0.10<br>05  | 4.965±<br>0.5551 | 5.643±0.<br>3306 |
| Ile Phe Gln                                     | dow<br>n | 1.3<br>79<br>3 | 0.7895 | 0.04<br>934       | 0.14<br>49  | 3.904±<br>1.135  | 4.945±0.<br>3708 |
| Ecgonine                                        | dow<br>n | 1.3<br>67<br>3 | 0.8673 | 0.03<br>212       | 0.08<br>144 | 4.633±<br>0.1402 | 5.342±0.<br>9461 |
| Glu Val Lys                                     | dow<br>n | 1.3<br>55<br>1 | 0.8704 | 0.00<br>461<br>4  | 0.06<br>395 | 4.628±<br>0.3523 | 5.317±0.<br>4649 |
| 3-(1-Hydroxymethyl-1-propenyl)pentanedioic acid | up       | 1.3<br>50<br>6 | 1.1591 | 0.00<br>939<br>2  | 0.04<br>362 | 6.383±<br>0.1685 | 5.507±0.<br>9157 |
| 8-Azaspiro[4.5]decane-7,9-dione                 | up       | 1.3<br>48      | 1.1301 | 0.00<br>099<br>54 | 0.03<br>501 | 5.662±<br>0.3215 | 5.01±0.2<br>72   |
| 4-O-(Indole-3-acetyl)-D-glucopyranose           | dow<br>n | 1.3<br>45      | 0.8582 | 0.03<br>302       | 0.08<br>262 | 3.97±0.<br>6219  | 4.626±0.<br>3366 |

|                                                           |          |                |        |                   |             |                  |                  |
|-----------------------------------------------------------|----------|----------------|--------|-------------------|-------------|------------------|------------------|
|                                                           |          | 5              |        |                   |             |                  |                  |
| PA(20:5(6E,8Z,11Z,14Z,17Z)-OH(5)/i-15:0)                  | dow<br>n | 1.3<br>38<br>1 | 0.8298 | 0.03<br>763       | 0.12<br>9   | 3.943±<br>0.625  | 4.752±0.<br>7752 |
| Oxalic Acid                                               | dow<br>n | 1.3<br>37<br>6 | 0.8755 | 0.03<br>325       | 0.08<br>287 | 4.157±<br>0.5985 | 4.748±0.<br>112  |
| Butyl (S)-3-hydroxybutyrate [arabinosyl-(1->6)-glucoside] | dow<br>n | 1.3<br>34<br>9 | 0.8447 | 0.00<br>692<br>2  | 0.07<br>626 | 4.427±<br>0.5697 | 5.241±0.<br>3346 |
| Dilept                                                    | dow<br>n | 1.3<br>34<br>9 | 0.8685 | 0.02<br>117       | 0.10<br>59  | 4.478±<br>0.5479 | 5.156±0.<br>4204 |
| Leu Ile                                                   | dow<br>n | 1.3<br>34<br>1 | 0.8839 | 0.00<br>641<br>8  | 0.07<br>431 | 5.472±<br>0.3574 | 6.191±0.<br>5472 |
| Trp Ile                                                   | dow<br>n | 1.3<br>30<br>6 | 0.8856 | 0.00<br>050<br>73 | 0.02<br>694 | 5.014±<br>0.2881 | 5.662±0.<br>2632 |
| Thiodiacetic acid                                         | up       | 1.3<br>30<br>5 | 1.1679 | 0.04<br>19        | 0.13<br>64  | 5.587±<br>0.7311 | 4.784±0.<br>6215 |
| Asp Leu                                                   | dow<br>n | 1.3<br>28<br>8 | 0.9008 | 0.00<br>431<br>7  | 0.06<br>246 | 5.905±<br>0.4241 | 6.555±0.<br>2445 |
| Phe Ile                                                   | dow      | 1.3            | 0.892  | 0.00              | 0.08        | 5.623±           | 6.304±0.         |

|                                                             |          |                |        |                  |             |                  |                  |
|-------------------------------------------------------------|----------|----------------|--------|------------------|-------------|------------------|------------------|
|                                                             | n        | 22             |        | 945<br>8         | 416         | 0.2677           | 6405             |
| Asn Ile Phe                                                 | dow<br>n | 1.3<br>20<br>8 | 0.7004 | 0.00<br>812<br>8 | 0.08<br>132 | 2.843±<br>0.4072 | 4.059±1.<br>155  |
| Arginyl-prolyl-proline                                      | dow<br>n | 1.3<br>20<br>3 | 0.8168 | 0.01<br>393      | 0.05<br>544 | 4.266±<br>0.5694 | 5.223±0.<br>7963 |
| 2-n-Propyl-4-oxopentanoic acid                              | up       | 1.3<br>17<br>5 | 1.1663 | 0.00<br>633<br>2 | 0.07<br>422 | 4.853±<br>0.1394 | 4.161±0.<br>6733 |
| Caprylic acid                                               | dow<br>n | 1.3<br>17      | 0.8984 | 0.00<br>790<br>1 | 0.07<br>989 | 5.104±<br>0.1893 | 5.681±0.<br>5476 |
| 5-Heptyltetrahydro-2-oxo-3-furancarboxylic acid             | dow<br>n | 1.3<br>06<br>4 | 0.8951 | 0.01<br>405      | 0.05<br>559 | 5.257±<br>0.1562 | 5.873±0.<br>6804 |
| Thr Glu Phe                                                 | dow<br>n | 1.3<br>05<br>8 | 0.8481 | 0.04<br>156      | 0.13<br>56  | 4.058±<br>0.677  | 4.785±0.<br>5256 |
| 12-Hydroxydodecanoic acid                                   | up       | 1.3<br>04<br>3 | 1.1283 | 0.01<br>782      | 0.06<br>096 | 5.206±<br>0.1096 | 4.614±0.<br>6988 |
| 2-(1,2,3,4-Tetrahydroxybutyl)thiazolidine-4-carboxylic acid | up       | 1.3<br>03<br>5 | 1.178  | 0.00<br>941<br>1 | 0.08<br>416 | 4.433±<br>0.3778 | 3.763±0.<br>5139 |

|                                               |          |                |        |                   |             |                  |                  |
|-----------------------------------------------|----------|----------------|--------|-------------------|-------------|------------------|------------------|
| N-NITROSOMORPHOLINE                           | dow<br>n | 1.3<br>01<br>6 | 0.8664 | 0.02<br>255       | 0.06<br>763 | 4.059±<br>0.461  | 4.685±0.<br>494  |
| Diocetyl phthalate                            | up       | 1.2<br>99<br>1 | 1.2038 | 0.04<br>388       | 0.13<br>91  | 5.76±0.<br>7614  | 4.785±0.<br>9956 |
| 1-(11Z,14Z-eicosadienoyl)-glycero-3-phosphate | dow<br>n | 1.2<br>97<br>1 | 0.9247 | 0.04<br>951       | 0.10<br>33  | 6.253±<br>0.5194 | 6.762±0.<br>3186 |
| Tolmetin                                      | up       | 1.2<br>95<br>9 | 1.2181 | 0.03<br>411       | 0.12<br>46  | 4.636±<br>0.7976 | 3.806±0.<br>4105 |
| Neoporrigenin B                               | dow<br>n | 1.2<br>93      | 0.8866 | 0.03<br>331       | 0.12<br>33  | 5.224±<br>0.6785 | 5.892±0.<br>111  |
| 3-Methyl-5-pentyl-2-furanundecanoic acid      | dow<br>n | 1.2<br>91<br>8 | 0.931  | 0.00<br>026<br>42 | 0.02<br>694 | 6.343±<br>0.1833 | 6.813±0.<br>1974 |
| Azithromycin                                  | up       | 1.2<br>90<br>1 | 1.1925 | 0.03<br>863       | 0.13<br>03  | 5.228±<br>0.7213 | 4.384±0.<br>709  |
| N1-Methyl-4-pyridone-3-carboxamide            | up       | 1.2<br>85<br>5 | 1.1261 | 0.00<br>342<br>6  | 0.05<br>804 | 5.652±<br>0.3031 | 5.019±0.<br>4185 |
| Ser Leu Ser Gly Leu                           | dow<br>n | 1.2<br>85      | 0.7875 | 0.03<br>38        | 0.12<br>42  | 3.639±<br>0.8619 | 4.621±0.<br>7019 |
| Asp Asn Leu                                   | dow      | 1.2            | 0.8592 | 0.03              | 0.12        | 4.997±           | 5.816±0.         |



|                                                         |          |                |        |                  |             |                  |                  |
|---------------------------------------------------------|----------|----------------|--------|------------------|-------------|------------------|------------------|
|                                                         | n        | 85             |        | 572              | 68          | 0.7498           | 5383             |
| LysoPC(P-18:0/0:0)                                      | dow<br>n | 1.2<br>81<br>3 | 0.9031 | 0.01<br>983      | 0.10<br>44  | 6.097±<br>0.5729 | 6.751±0.<br>2421 |
| Gamma-Undecalactone                                     | dow<br>n | 1.2<br>81<br>2 | 0.8797 | 0.02<br>277      | 0.10<br>81  | 4.411±<br>0.517  | 5.014±0.<br>3184 |
| Cis-Zeatin-7-N-glucoside                                | dow<br>n | 1.2<br>80<br>3 | 0.8206 | 0.00<br>479<br>3 | 0.06<br>534 | 3.289±<br>0.4442 | 4.008±0.<br>3606 |
| PS(20:3(5Z,8Z,11Z)/20:5(7Z,9Z,11E,13E,17Z)-3OH(5,6,15)) | dow<br>n | 1.2<br>76<br>3 | 0.8653 | 0.00<br>635<br>3 | 0.07<br>422 | 3.637±<br>0.3672 | 4.203±0.<br>2911 |
| Dihydrojasmonic acid                                    | dow<br>n | 1.2<br>68<br>6 | 0.8937 | 0.00<br>679<br>7 | 0.03<br>898 | 4.866±<br>0.1127 | 5.445±0.<br>5715 |
| 4-Amino-1-[5-(hydroxymethyl)oxolan-2-yl]pyrimidin-2-one | dow<br>n | 1.2<br>68<br>1 | 0.896  | 0.00<br>233<br>5 | 0.04<br>695 | 4.883±<br>0.2648 | 5.45±0.3<br>448  |
| Ala Leu Leu                                             | dow<br>n | 1.2<br>67<br>2 | 0.8462 | 0.03<br>261      | 0.12<br>26  | 4.65±0.<br>7449  | 5.495±0.<br>5775 |
| Betavulgarin                                            | up       | 1.2<br>64<br>4 | 1.1348 | 0.01<br>268      | 0.05<br>212 | 5.201±<br>0.1206 | 4.583±0.<br>6827 |
| KIRENOL                                                 | dow      | 1.2            | 0.8847 | 0.03             | 0.12        | 5.04±0.          | 5.697±0.         |

|                                     |          |                |        |                  |             |                  |                  |
|-------------------------------------|----------|----------------|--------|------------------|-------------|------------------|------------------|
|                                     | n        | 61<br>9        |        | 473              | 51          | 4979             | 6194             |
| Pro Pro Gln                         | dow<br>n | 1.2<br>58<br>5 | 0.8674 | 0.01<br>506      | 0.09<br>708 | 4.437±<br>0.5569 | 5.115±0.<br>2647 |
| Lys Leu Gln                         | up       | 1.2<br>58<br>2 | 1.1151 | 0.00<br>484<br>6 | 0.06<br>534 | 5.811±<br>0.3482 | 5.211±0.<br>3482 |
| LysoPE(22:5(4Z,7Z,10Z,13Z,16Z)/0:0) | up       | 1.2<br>56<br>4 | 1.213  | 0.03<br>548      | 0.12<br>67  | 5.7±0.7<br>191   | 4.699±1.<br>005  |
| PC(P-16:0/0:0)                      | dow<br>n | 1.2<br>42<br>3 | 0.9251 | 0.02<br>984      | 0.11<br>8   | 7.344±<br>0.5688 | 7.939±0.<br>2351 |
| PI(22:2(13Z,16Z)/TXB2)              | dow<br>n | 1.2<br>38<br>1 | 0.8747 | 0.03<br>303      | 0.12<br>31  | 4.571±<br>0.6558 | 5.226±0.<br>1728 |
| Ile Val                             | dow<br>n | 1.2<br>36<br>8 | 0.8962 | 0.03<br>126      | 0.12<br>02  | 5.309±<br>0.4575 | 5.924±0.<br>5637 |
| Geranylcitronellol                  | up       | 1.2<br>33<br>4 | 1.1031 | 0.00<br>730<br>6 | 0.07<br>823 | 7.081±<br>0.2096 | 6.419±0.<br>6236 |
| Ethanone, 1-(4-butylphenyl)-        | dow<br>n | 1.2<br>21<br>6 | 0.8998 | 0.01<br>561      | 0.09<br>808 | 4.761±<br>0.2947 | 5.291±0.<br>4827 |

|                                     |          |                |        |                  |             |                  |                  |
|-------------------------------------|----------|----------------|--------|------------------|-------------|------------------|------------------|
| Cytarabine                          | dow<br>n | 1.2<br>08<br>8 | 0.8772 | 0.02<br>243      | 0.10<br>81  | 4.772±<br>0.5028 | 5.44±0.5<br>061  |
| Leu Gln Ala                         | dow<br>n | 1.2<br>08<br>4 | 0.8433 | 0.02<br>834      | 0.11<br>65  | 4.504±<br>0.7062 | 5.341±0.<br>5788 |
| PC(P-18:0/0:0)                      | up       | 1.2<br>05<br>6 | 1.125  | 0.01<br>247      | 0.09<br>18  | 6.632±<br>0.5469 | 5.895±0.<br>3942 |
| Pentaethylene glycol                | up       | 1.2<br>01<br>7 | 1.1104 | 0.00<br>514      | 0.06<br>635 | 5.433±<br>0.2463 | 4.893±0.<br>412  |
| Nerolidol                           | up       | 1.1<br>99<br>7 | 1.1622 | 0.00<br>684<br>5 | 0.07<br>613 | 4.923±<br>0.2734 | 4.236±0.<br>6001 |
| Foropafant                          | up       | 1.1<br>99<br>2 | 1.1497 | 0.01<br>85       | 0.10<br>23  | 5.1±0.3<br>765   | 4.436±0.<br>6301 |
| Stearoylcarnitine                   | up       | 1.1<br>95<br>9 | 1.0993 | 0.01<br>255      | 0.09<br>18  | 7.57±0.<br>3676  | 6.886±0.<br>5972 |
| LysoPC(22:5(4Z,7Z,10Z,13Z,16Z)/0:0) | dow<br>n | 1.1<br>94<br>8 | 0.8915 | 0.04<br>82       | 0.14<br>35  | 5.489±<br>0.6641 | 6.157±0.<br>4522 |
| Linoleic Acid                       | dow<br>n | 1.1<br>94      | 0.9443 | 0.00<br>921      | 0.04<br>347 | 6.107±<br>0.2791 | 6.467±0.<br>0966 |

|                                                                                                                 |      |                |        |                  |             |                  |                  |
|-----------------------------------------------------------------------------------------------------------------|------|----------------|--------|------------------|-------------|------------------|------------------|
|                                                                                                                 |      | 2              |        | 8                |             |                  |                  |
| Gentamicin C                                                                                                    | up   | 1.1<br>88<br>2 | 1.1029 | 0.01<br>484      | 0.09<br>673 | 5.876±<br>0.3844 | 5.328±0.<br>3789 |
| (5Z)-7-[(1R,2R,3R,5S)-3,5-Dihydroxy-2-[(1E,3S,5Z)-3-hydroxyocta-1,5-dien-1-yl]cyclopentyl]hept-5-enoylcarnitine | up   | 1.1<br>80<br>4 | 1.1339 | 0.01<br>978      | 0.06<br>392 | 5.675±<br>0.4475 | 5.005±0.<br>5658 |
| 3,4-Di-O-caffeoylquinic acid                                                                                    | down | 1.1<br>77<br>4 | 0.9091 | 0.03<br>542      | 0.12<br>67  | 5.151±<br>0.4565 | 5.666±0.<br>3723 |
| Dodecatrienoic acid                                                                                             | down | 1.1<br>71<br>4 | 0.9036 | 0.02<br>262      | 0.10<br>81  | 4.581±<br>0.3141 | 5.07±0.4<br>541  |
| Butylate                                                                                                        | up   | 1.1<br>68<br>3 | 1.1063 | 0.01<br>669      | 0.09<br>983 | 5.892±<br>0.3776 | 5.326±0.<br>447  |
| D-Galactose                                                                                                     | up   | 1.1<br>67<br>1 | 1.0908 | 0.00<br>246<br>6 | 0.02<br>67  | 5.9±0.1<br>809   | 5.409±0.<br>3569 |
| (E)-6,10-Dimethyl-9-methylene-5-undecen-2-one                                                                   | up   | 1.1<br>66<br>6 | 1.1569 | 0.00<br>633<br>4 | 0.07<br>422 | 5±0.25<br>28     | 4.322±0.<br>5952 |
| Anispermus                                                                                                      | up   | 1.1<br>61<br>8 | 1.1461 | 0.00<br>895<br>6 | 0.08<br>337 | 5.664±<br>0.2352 | 4.942±0.<br>704  |
| Serylhydroxyproline                                                                                             | down | 1.1            | 0.9118 | 0.01             | 0.05        | 5.137±           | 5.634±0.         |

|                                                  |          |                |        |                   |             |                  |                  |
|--------------------------------------------------|----------|----------------|--------|-------------------|-------------|------------------|------------------|
|                                                  | n        | 59<br>1        |        | 331               | 376         | 0.3048           | 3953             |
| Leu Val                                          | dow<br>n | 1.1<br>58      | 0.878  | 0.03<br>568       | 0.12<br>68  | 4.916±<br>0.5466 | 5.599±0.<br>6082 |
| 4-(2,6,6-Trimethyl-1-cyclohexen-1-yl)-2-butanone | up       | 1.1<br>50<br>6 | 1.1313 | 0.00<br>355<br>7  | 0.05<br>911 | 4.998±<br>0.1671 | 4.418±0.<br>4887 |
| 2-Hydroxy-3-Methylbutyric Acid                   | up       | 1.1<br>45<br>5 | 1.0908 | 0.00<br>014<br>99 | 0.02<br>392 | 5.839±<br>0.1292 | 5.353±0.<br>252  |
| PC(18:4(6Z,9Z,12Z,15Z)/20:0)                     | up       | 1.1<br>44      | 1.099  | 0.03<br>167       | 0.12<br>09  | 7.335±<br>0.2125 | 6.674±0.<br>8521 |
| 11-Aminoundecanoic Acid                          | up       | 1.1<br>43<br>6 | 1.1231 | 0.01<br>675       | 0.09<br>983 | 4.698±<br>0.1617 | 4.183±0.<br>5762 |
| Citreoviridin C                                  | up       | 1.1<br>40<br>6 | 1.1228 | 0.01<br>707       | 0.10<br>04  | 4.581±<br>0.2168 | 4.08±0.5<br>246  |
| 7a,12a-Dihydroxy-3-oxo-4-cholenoic acid          | up       | 1.1<br>37<br>2 | 1.1481 | 0.02<br>909       | 0.11<br>74  | 6.194±<br>0.4901 | 5.395±0.<br>8385 |
| D-(+)-dihydrocarvone                             | up       | 1.1<br>36<br>9 | 1.1475 | 0.00<br>581<br>2  | 0.07<br>088 | 4.917±<br>0.2166 | 4.285±0.<br>5594 |
| Prolylhydroxyproline                             | dow<br>n | 1.1<br>35      | 0.9158 | 0.00<br>119       | 0.02<br>392 | 5.622±<br>0.2757 | 6.139±0.<br>1854 |

|                                                              |          |                |        |                  |             |                  |                  |
|--------------------------------------------------------------|----------|----------------|--------|------------------|-------------|------------------|------------------|
|                                                              |          | 7              |        | 1                |             |                  |                  |
| LysoPE(0:0/20:5(5Z,8Z,11Z,14Z,17Z))                          | up       | 1.1<br>34<br>2 | 1.1121 | 0.01<br>435      | 0.09<br>539 | 6.319±<br>0.3821 | 5.682±0.<br>5334 |
| 9,10-Dihome                                                  | dow<br>n | 1.1<br>33<br>2 | 0.9247 | 0.01<br>969      | 0.06<br>385 | 6.028±<br>0.2659 | 6.519±0.<br>4883 |
| Z-LLNle-CHO                                                  | up       | 1.1<br>32<br>9 | 1.0933 | 0.02<br>49       | 0.11<br>06  | 6.049±<br>0.426  | 5.533±0.<br>3417 |
| (23S)-23,25-dihydroxy-24-oxovitamin D3 23-(beta-glucuronide) | dow<br>n | 1.1<br>30<br>8 | 0.7839 | 0.04<br>308      | 0.13<br>8   | 3.592±<br>0.8481 | 4.582±0.<br>8858 |
| Cysteinylglycine                                             | up       | 1.1<br>3       | 1.1358 | 0.04<br>529      | 0.14<br>01  | 5.009±<br>0.4444 | 4.41±0.6<br>513  |
| Antipyrine                                                   | up       | 1.1<br>28<br>9 | 1.2012 | 0.03<br>438      | 0.12<br>49  | 3.117±<br>0.4879 | 2.595±0.<br>3032 |
| Benzocaine                                                   | dow<br>n | 1.1<br>27<br>5 | 0.8988 | 0.00<br>744<br>5 | 0.07<br>906 | 4.618±<br>0.3555 | 5.138±0.<br>2517 |
| 4-Vinylcyclohexene                                           | dow<br>n | 1.1<br>27<br>2 | 0.9032 | 0.02<br>348      | 0.10<br>86  | 4.572±<br>0.298  | 5.062±0.<br>4798 |
| (R)-Pterosin B                                               | dow<br>n | 1.1<br>16      | 0.9364 | 0.03<br>194      | 0.12<br>11  | 6.71±0.<br>4505  | 7.166±0.<br>1365 |

|                                                                   |          |                |        |                  |             |                  |                  |
|-------------------------------------------------------------------|----------|----------------|--------|------------------|-------------|------------------|------------------|
|                                                                   |          | 1              |        |                  |             |                  |                  |
| Beta-Citryl-L-glutamic acid                                       | up       | 1.1<br>11      | 1.0855 | 0.01<br>349      | 0.09<br>379 | 6.707±<br>0.2087 | 6.179±0.<br>537  |
| Glutamylleucine                                                   | dow<br>n | 1.1<br>10<br>5 | 0.9011 | 0.02<br>58       | 0.11<br>25  | 5.039±<br>0.3931 | 5.592±0.<br>4895 |
| Iniparib                                                          | up       | 1.1<br>09<br>6 | 1.1395 | 0.02<br>256      | 0.06<br>763 | 4.901±<br>0.1077 | 4.301±0.<br>7449 |
| Sulindac                                                          | up       | 1.1<br>08<br>1 | 1.067  | 0.00<br>197      | 0.02<br>589 | 6.244±<br>0.1113 | 5.852±0.<br>2988 |
| LysoPC(16:0/0:0)                                                  | up       | 1.1<br>04<br>6 | 1.1669 | 0.01<br>565      | 0.05<br>815 | 4.628±<br>0.4528 | 3.966±0.<br>4908 |
| Polidocanol                                                       | up       | 1.1<br>04<br>3 | 1.0845 | 0.00<br>988<br>5 | 0.08<br>514 | 6.057±<br>0.2831 | 5.585±0.<br>3439 |
| 3,4-Pyrrolidinediol, 2-(p-methoxybenzyl)-, 3-acetate, (2S,3R,4R)- | up       | 1.1<br>02<br>2 | 1.1036 | 0.02<br>117      | 0.10<br>59  | 6.339±<br>0.3155 | 5.744±0.<br>61   |
| Epsilon-(Carboxyethyl)lysine                                      | dow<br>n | 1.0<br>94<br>2 | 0.9189 | 0.00<br>602<br>3 | 0.07<br>238 | 5.089±<br>0.274  | 5.538±0.<br>2613 |
| Val Tyr                                                           | dow<br>n | 1.0<br>94      | 0.8997 | 0.03<br>782      | 0.12<br>93  | 4.789±<br>0.5115 | 5.323±0.<br>3152 |

|                                         |          |                |        |                   |             |                       |                  |
|-----------------------------------------|----------|----------------|--------|-------------------|-------------|-----------------------|------------------|
|                                         |          | 1              |        |                   |             |                       |                  |
| Indolelactic acid                       | up       | 1.0<br>88<br>6 | 1.074  | 0.00<br>019<br>79 | 0.02<br>392 | 5.196±<br>0.1467      | 4.838±0.<br>1245 |
| Cis-Quinceoxepane                       | up       | 1.0<br>79<br>7 | 1.1484 | 0.00<br>981<br>2  | 0.08<br>514 | 5.014±<br>0.1894      | 4.366±0.<br>6547 |
| LysoPS(18:0/0:0)                        | up       | 1.0<br>78<br>8 | 1.0906 | 0.03<br>558       | 0.08<br>515 | 6.032±<br>0.3055      | 5.531±0.<br>5649 |
| Arachidonoyl Ethanolamide               | up       | 1.0<br>73      | 1.1577 | 0.02<br>598       | 0.11<br>29  | 5.711±<br>0.3342      | 4.933±0.<br>9074 |
| Ibuprofen glucuronide                   | up       | 1.0<br>7       | 1.1151 | 0.03<br>317       | 0.08<br>287 | 5.938±<br>0.0885<br>8 | 5.325±0.<br>8329 |
| Sulfonamidoethanol                      | up       | 1.0<br>62<br>5 | 1.1107 | 0.02<br>332       | 0.10<br>86  | 6.171±<br>0.2752      | 5.556±0.<br>6893 |
| Gemfibrozil                             | up       | 1.0<br>59      | 1.1098 | 0.01<br>261       | 0.05<br>207 | 5.315±<br>0.0850<br>6 | 4.789±0.<br>5849 |
| 9,10-Epoxy-18-hydroxy-octadecanoic acid | dow<br>n | 1.0<br>58<br>2 | 0.9308 | 0.02<br>676       | 0.11<br>41  | 5.943±<br>0.2383      | 6.385±0.<br>4821 |
| Ambrosonide                             | up       | 1.0<br>56      | 1.1014 | 0.00<br>965       | 0.08<br>468 | 6.085±<br>0.1621      | 5.525±0.<br>5655 |



|                         |          |                |        |                  |             |                  |                  |
|-------------------------|----------|----------------|--------|------------------|-------------|------------------|------------------|
|                         |          | 4              |        | 5                |             |                  |                  |
| Ile Gly                 | dow<br>n | 1.0<br>55      | 0.9071 | 0.03<br>069      | 0.11<br>94  | 5.351±<br>0.3541 | 5.899±0.<br>5658 |
| Galaxolide              | up       | 1.0<br>48<br>9 | 1.1466 | 0.02<br>064      | 0.10<br>53  | 4.887±<br>0.3179 | 4.262±0.<br>6477 |
| P-Dichlorobenzene       | up       | 1.0<br>47<br>9 | 1.0781 | 0.00<br>199<br>1 | 0.02<br>589 | 5.229±<br>0.1299 | 4.85±0.2<br>732  |
| Palmitic amide          | up       | 1.0<br>47<br>7 | 1.0795 | 0.00<br>687<br>1 | 0.07<br>613 | 6.804±<br>0.1865 | 6.303±0.<br>4474 |
| Maniladiol              | up       | 1.0<br>45      | 1.0707 | 0.02<br>633      | 0.11<br>37  | 5.661±<br>0.2394 | 5.287±0.<br>3672 |
| 2-(L-Menthoxy)ethanol   | up       | 1.0<br>42<br>9 | 1.0922 | 0.03<br>71       | 0.12<br>84  | 5.842±<br>0.1114 | 5.349±0.<br>6766 |
| Asp-Phe                 | dow<br>n | 1.0<br>38<br>6 | 0.9046 | 0.01<br>185      | 0.09<br>023 | 5.412±<br>0.4111 | 5.983±0.<br>3258 |
| Trihexyphenidyl         | up       | 1.0<br>36<br>9 | 1.0988 | 0.01<br>453      | 0.09<br>575 | 5.05±0.<br>1599  | 4.596±0.<br>4819 |
| ALANYL-dl-PHENYLALANINE | dow<br>n | 1.0<br>33<br>7 | 0.893  | 0.03<br>862      | 0.13<br>03  | 4.69±0.<br>4603  | 5.252±0.<br>5049 |

|                                                                                                                                                                                                                |          |                |        |                  |             |                  |                  |
|----------------------------------------------------------------------------------------------------------------------------------------------------------------------------------------------------------------|----------|----------------|--------|------------------|-------------|------------------|------------------|
| 3-Hydroxybutanoic Acid                                                                                                                                                                                         | up       | 1.0<br>31<br>5 | 1.0522 | 0.00<br>227<br>8 | 0.02<br>67  | 7.034±<br>0.1546 | 6.685±0.<br>2219 |
| Antcin K                                                                                                                                                                                                       | dow<br>n | 1.0<br>30<br>2 | 0.9259 | 0.03<br>649      | 0.12<br>75  | 6.961±<br>0.453  | 7.518±0.<br>4905 |
| Behenic acid                                                                                                                                                                                                   | up       | 1.0<br>28<br>4 | 1.0721 | 0.01<br>06       | 0.08<br>684 | 7.168±<br>0.3232 | 6.686±0.<br>3038 |
| N-Methyl-L-glutamate                                                                                                                                                                                           | up       | 1.0<br>28<br>3 | 1.1222 | 0.03<br>608      | 0.12<br>71  | 5.08±0.<br>1562  | 4.527±0.<br>7449 |
| (2S,3S,5S,8R,9S,10S,13S,14S,16S,17R)-17-Acetyloxy-10,13-dimethyl-2-morpholin-4-yl-16-(1-prop-2-enylpyrrolidin-1-ium-1-yl)-2,3,4,5,6,7,8,9,11,12,14,15,16,17-tetradecahydro-1H-cyclopenta[a]phenanthren-3-olate | up       | 1.0<br>23<br>4 | 1.0481 | 0.02<br>28       | 0.10<br>81  | 7.8±0.2<br>261   | 7.442±0.<br>336  |
| Morphinone                                                                                                                                                                                                     | dow<br>n | 1.0<br>22<br>7 | 0.8725 | 0.03<br>415      | 0.12<br>46  | 3.9±0.4<br>802   | 4.47±0.4<br>543  |
| Cinobufagin                                                                                                                                                                                                    | up       | 1.0<br>22      | 1.0625 | 0.04<br>525      | 0.14<br>01  | 7.348±<br>0.1727 | 6.916±0.<br>5926 |
| (1R,4E,6S,7S,17R)-4-Ethylidene-7-hydroxy-7-(hydroxymethyl)-6-methyl-2,9-dioxo-14-azatricyclo[9.5.1.0 <sup>14,17</sup> ]heptadec-11-ene-3,8-dione                                                               | dow<br>n | 1.0<br>20<br>7 | 0.9128 | 0.04<br>027      | 0.13<br>33  | 5.121±<br>0.4661 | 5.61±0.3<br>171  |
| METHACHOLINE                                                                                                                                                                                                   | up       | 1.0<br>20<br>6 | 1.1211 | 0.01<br>257      | 0.09<br>18  | 5.423±<br>0.3342 | 4.837±0.<br>4889 |

|                                                           |          |                |        |                  |             |                  |                  |
|-----------------------------------------------------------|----------|----------------|--------|------------------|-------------|------------------|------------------|
| 2-Butyne-1,4-diol                                         | up       | 1.0<br>16<br>8 | 1.1251 | 0.03<br>075      | 0.11<br>95  | 5.001±<br>0.1976 | 4.445±0.<br>7021 |
| Zeranol                                                   | up       | 1.0<br>14<br>8 | 1.1132 | 0.03<br>243      | 0.12<br>24  | 6.253±<br>0.2835 | 5.617±0.<br>78   |
| Oleamide                                                  | up       | 1.0<br>13<br>7 | 1.0629 | 0.00<br>963<br>7 | 0.08<br>468 | 7.98±0.<br>1624  | 7.508±0.<br>462  |
| L-Proline, 1-(2-methyl-3-(methylthio)-1-oxopropyl)-, (S)- | dow<br>n | 1.0<br>12<br>1 | 0.8629 | 0.03<br>261      | 0.12<br>26  | 3.771±<br>0.3376 | 4.37±0.6<br>823  |
| Eplerenone                                                | up       | 1.0<br>05<br>1 | 1.0814 | 0.01<br>114      | 0.08<br>88  | 6.312±<br>0.1735 | 5.837±0.<br>4715 |
| Beta-Aminopropionitrile                                   | up       | 1.0<br>04<br>7 | 1.1065 | 0.01<br>358      | 0.09<br>379 | 5.247±<br>0.3047 | 4.742±0.<br>4119 |
| Ethyl Myristate                                           | dow<br>n | 1.0<br>02      | 0.9396 | 0.03<br>519      | 0.08<br>471 | 5.596±<br>0.3627 | 5.956±0.<br>1166 |

**Table S6 Altered metabolic pathways between smoking PDAC and non-smoking PDAC groups of paracancerous tissue from surgical samples**

| <b>Pathway Description</b>                  | <b>Ratio in study</b> | <b>Ratio in pop</b> | <b><i>P</i></b> |
|---------------------------------------------|-----------------------|---------------------|-----------------|
| Pancreatic cancer                           | 1/63                  | 2/4407              | 0.02839         |
| Systemic lupus erythematosus                | 1/63                  | 3/4407              | 0.04229         |
| PPAR signaling pathway                      | 2/63                  | 5/4407              | 0.001956        |
| Retrograde endocannabinoid signaling        | 2/63                  | 19/4407             | 0.02942         |
| cAMP signaling pathway                      | 2/63                  | 25/4407             | 0.04887         |
| Ether lipid metabolism                      | 2/63                  | 25/4407             | 0.04887         |
| Alanine, aspartate and glutamate metabolism | 3/63                  | 28/4407             | 0.007071        |
| Glycine, serine and threonine metabolism    | 3/63                  | 48/4407             | 0.03052         |
| Neuroactive ligand-receptor interaction     | 3/63                  | 52/4407             | 0.03746         |
| Serotonergic synapse                        | 4/63                  | 42/4407             | 0.002826        |
| Arginine and proline metabolism             | 4/63                  | 69/4407             | 0.01639         |
| Arachidonic acid metabolism                 | 4/63                  | 75/4407             | 0.02163         |
| alpha-Linolenic acid metabolism             | 5/63                  | 44/4407             | 0.0003595       |
| Linoleic acid metabolism                    | 9/63                  | 28/4407             | 7.72E-11        |
| Choline metabolism in cancer                | 4/63                  | 11/4407             | 1.16E-05        |
| Glycerophospholipid metabolism              | 5/63                  | 56/4407             | 0.001108        |

**Table S7 Differential bacteria between smoking PDAC and non-smoking PDAC groups from FNA samples**

| Species name                         | Group            | Mean     | LDA value | <i>P</i> |
|--------------------------------------|------------------|----------|-----------|----------|
| f__Saccharimonadaceae                | PDAC_smoking     | 3.60037  | 3.258046  | 0.033246 |
| o__Streptosporangiales               | PDAC_smoking     | 2.367495 | 2.980661  | 0.046852 |
| g__norank_f__Bacteroidetes_BD2-2     | PDAC_non-smoking | 2.129596 | 3.100606  | 0.032976 |
| f__Weeksellaceae.g__Soonwooa         | PDAC_smoking     | 2.022999 | 3.359299  | 0.027012 |
| p__Proteobacteria                    | PDAC_non-smoking | 5.877802 | 5.018821  | 0.030041 |
| g__Pseudolabrys                      | PDAC_non-smoking | 1.376268 | 3.494831  | 0.032905 |
| g__Bradyrhizobium                    | PDAC_non-smoking | 2.744245 | 2.98733   | 0.040517 |
| g__Thalassotalea                     | PDAC_non-smoking | 1.677298 | 3.359313  | 0.046852 |
| g__Acholeplasma                      | PDAC_non-smoking | 1.899147 | 2.872176  | 0.004519 |
| g__Ellin6055                         | PDAC_non-smoking | 2.45545  | 2.999585  | 0.034187 |
| f__Bacteroidetes_BD2-2               | PDAC_non-smoking | 2.129596 | 3.122892  | 0.032976 |
| c__AD3                               | PDAC_non-smoking | 2.075238 | 3.426935  | 0.032905 |
| g__Turicibacter                      | PDAC_smoking     | 2.451815 | 3.003183  | 0.027207 |
| g__Eubacterium_brachy_group          | PDAC_smoking     | 2.066465 | 3.204207  | 0.046852 |
| f__Frankiaceae                       | PDAC_non-smoking | 1.376268 | 3.691745  | 0.032905 |
| f__Acholeplasmataceae                | PDAC_non-smoking | 1.899147 | 2.909901  | 0.004519 |
| o__norank_c__AD3                     | PDAC_non-smoking | 2.075238 | 3.110999  | 0.032905 |
| f__Peptococcaceae                    | PDAC_smoking     | 2.964353 | 2.819522  | 0.046852 |
| f__Muribaculaceae                    | PDAC_non-smoking | 3.322393 | 3.032627  | 0.041271 |
| o__Acholeplasmatales                 | PDAC_non-smoking | 1.899147 | 2.97838   | 0.004519 |
| f__norank_o__norank_c__AD3           | PDAC_non-smoking | 2.075238 | 3.350075  | 0.032905 |
| g__Polynucleobacter                  | PDAC_non-smoking | 1.85339  | 3.591186  | 0.032905 |
| g__TM7x                              | PDAC_smoking     | 3.504668 | 3.180837  | 0.033015 |
| g__norank_f__norank_o__norank_c__AD3 | PDAC_non-smoking | 2.075238 | 3.537623  | 0.032905 |
| g__Simiduia                          | PDAC_non-smoking | 1.677298 | 3.771282  | 0.032905 |
| p__Patescibacteria                   | PDAC_smoking     | 4.021625 | 3.687101  | 0.030941 |
| g__norank_f__Muribaculaceae          | PDAC_non-smoking | 3.319103 | 3.03649   | 0.041271 |
| o__Peptococcales                     | PDAC_smoking     | 2.964353 | 2.838272  | 0.046852 |
| g__Aggregatibacter                   | PDAC_smoking     | 3.708033 | 3.44933   | 0.026767 |
| c__Gammaproteobacteria               | PDAC_non-smoking | 5.867695 | 5.028827  | 0.038964 |
| g__norank_f__Lentimicrobiaceae       | PDAC_non-smoking | 1.376268 | 3.622662  | 0.032905 |
| c__Saccharimonadia                   | PDAC_smoking     | 4.005508 | 3.674639  | 0.023107 |
| o__Saccharimonadales                 | PDAC_smoking     | 4.005508 | 3.674639  | 0.023107 |
| g__Jatrophihabitans                  | PDAC_non-smoking | 1.376268 | 3.697893  | 0.032905 |
| f__Colwelliaceae                     | PDAC_non-smoking | 1.677298 | 3.360323  | 0.046852 |
| g__Peptococcus                       | PDAC_smoking     | 2.964353 | 2.81783   | 0.046852 |
| o__Burkholderiales                   | PDAC_non-smoking | 5.845462 | 5.092689  | 0.015757 |

Community barplot analysis

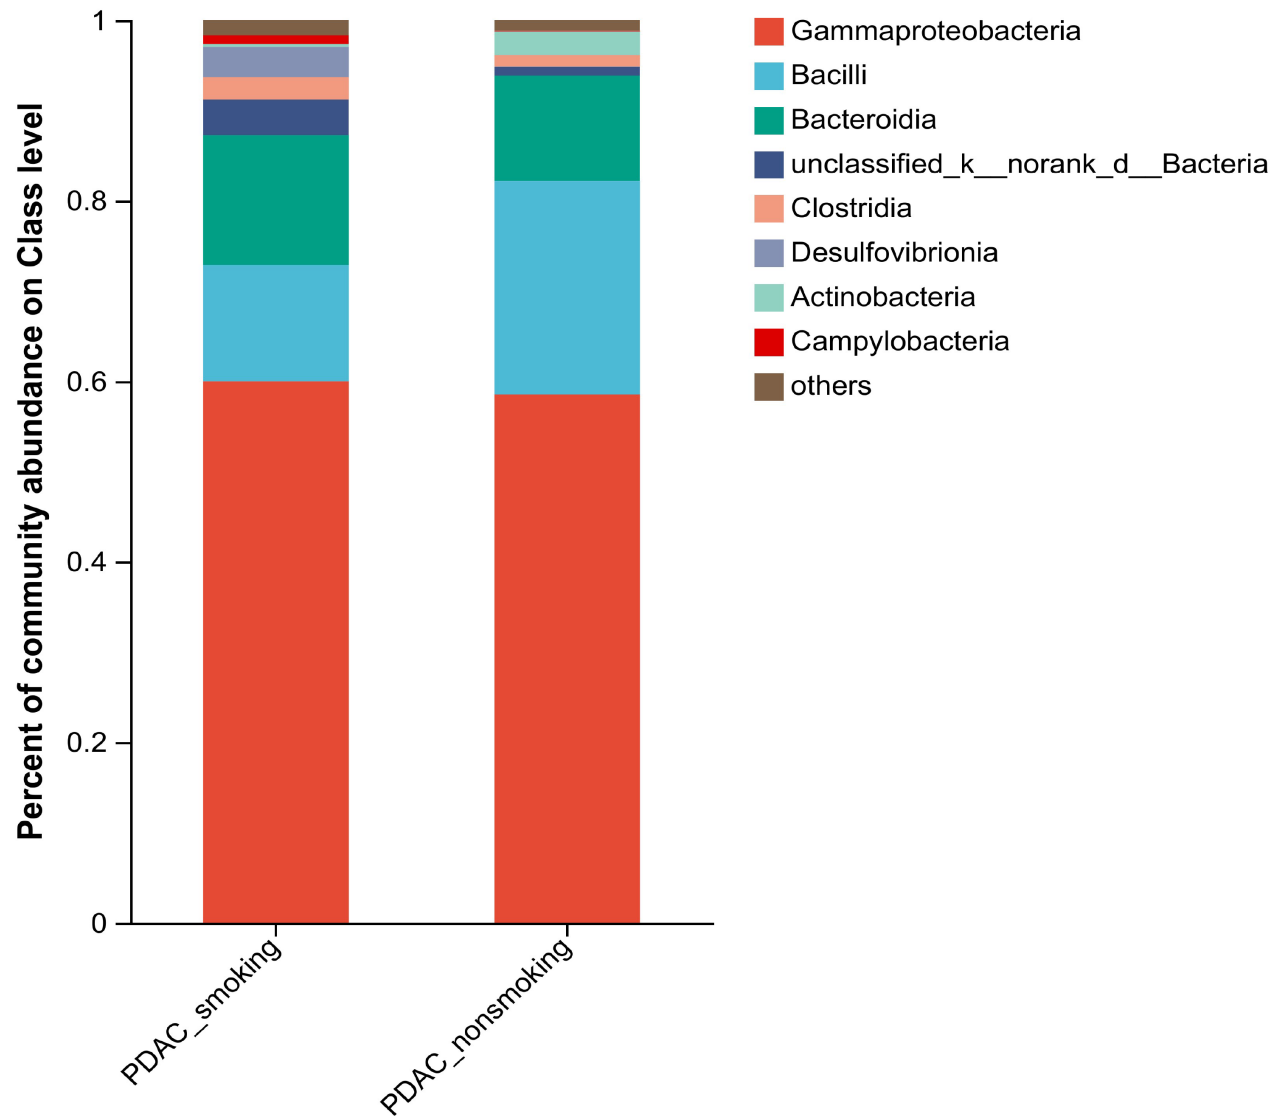

Fig. S1 Bacterial composition at the class level of subjects in tumor tissue of surgical samples.

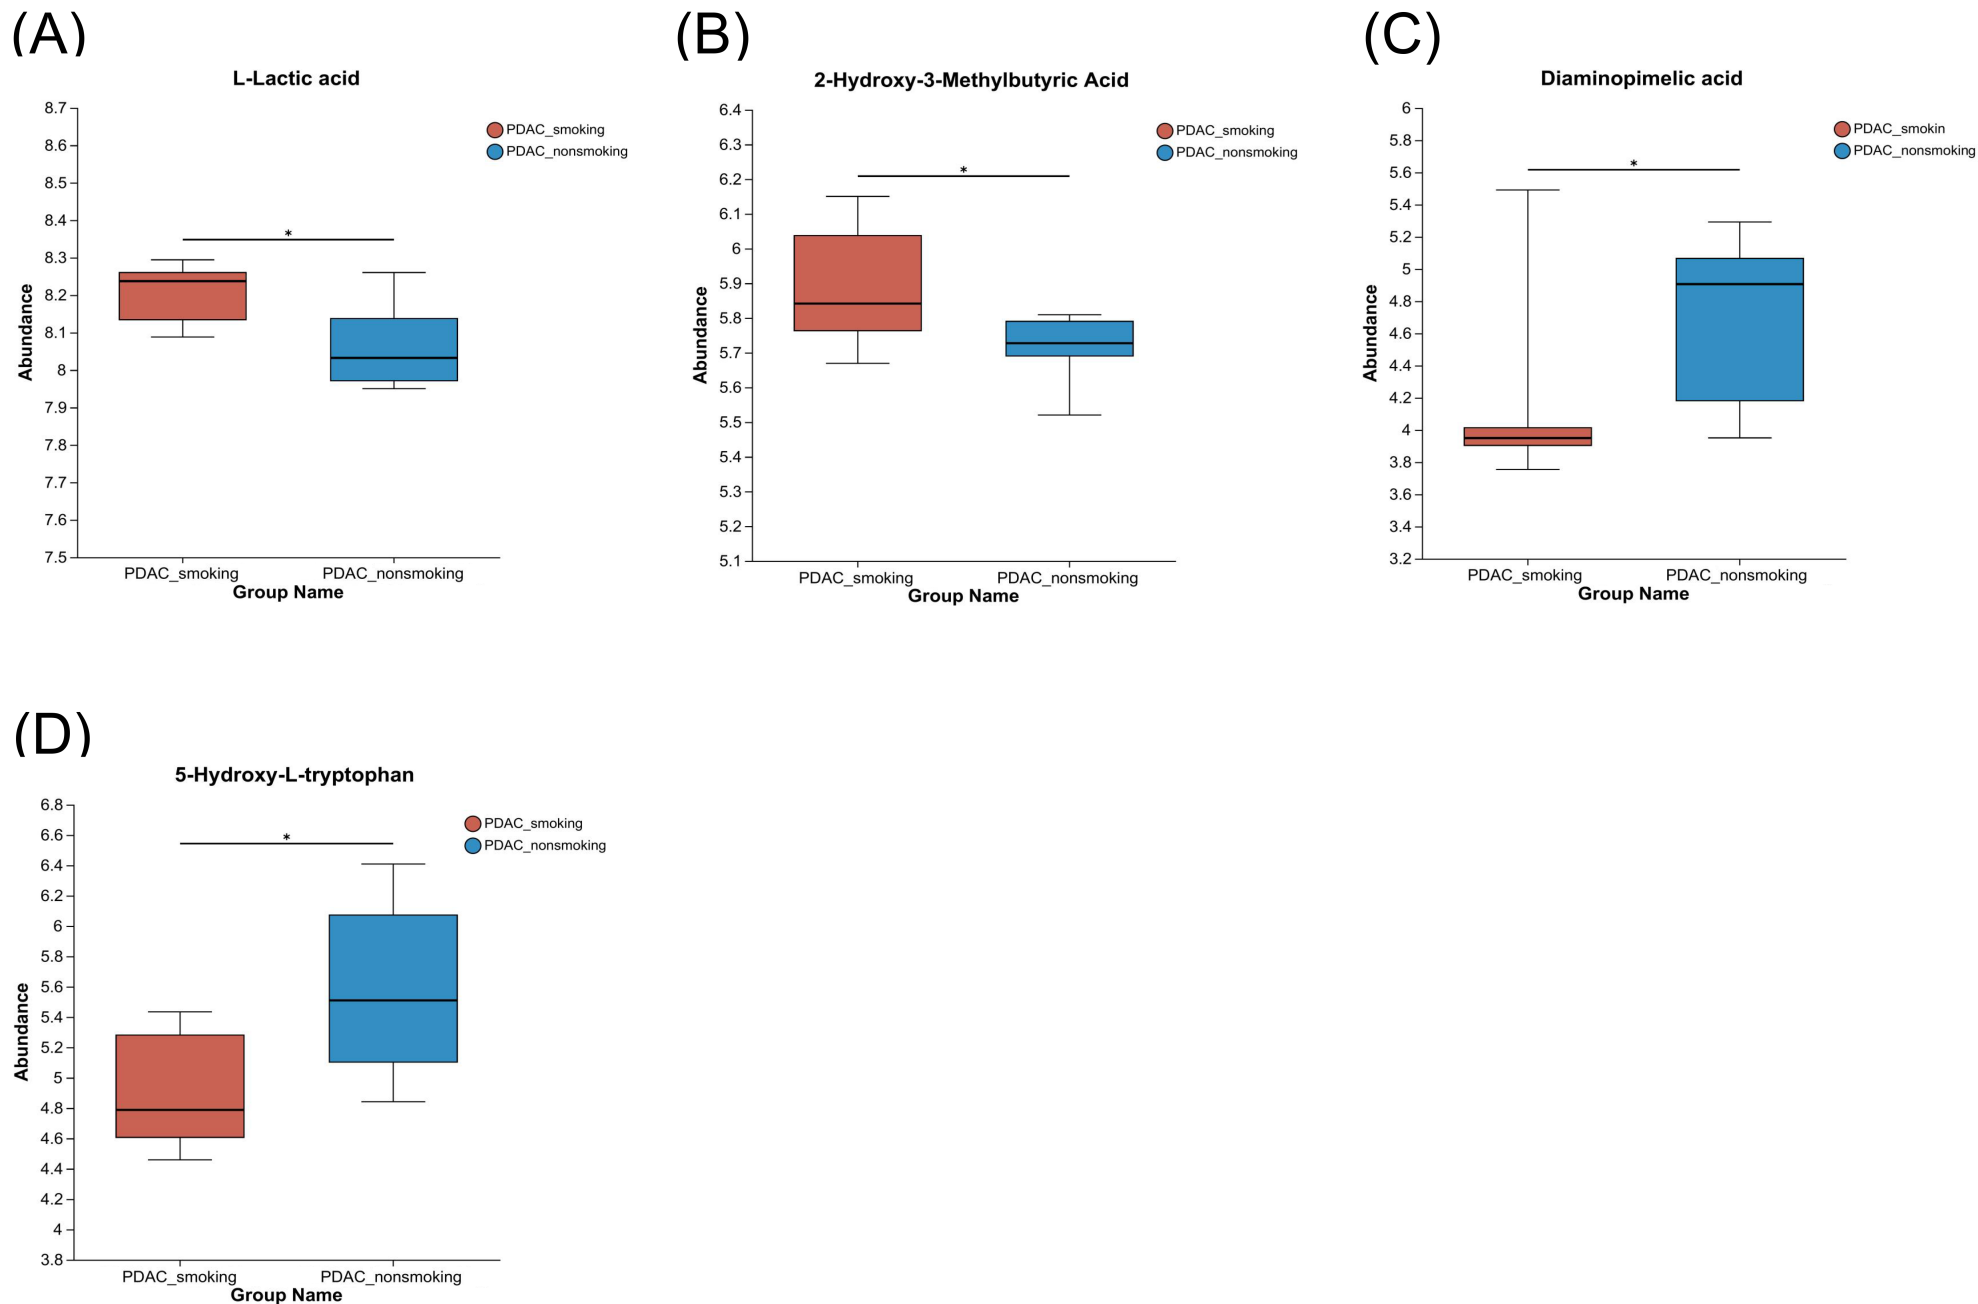

**Fig. S2 Partial differential metabolites in tumor tissue of surgical samples from smoking vs. non-smoking PDAC. L-lactic acid (A), 2-hydroxy-3-methylbutyric acid (B), diaminopimelic acid (C), 5-hydroxy-L-tryptophan (D).  $P < 0.05$  is marked as \*.**

## Community barplot analysis

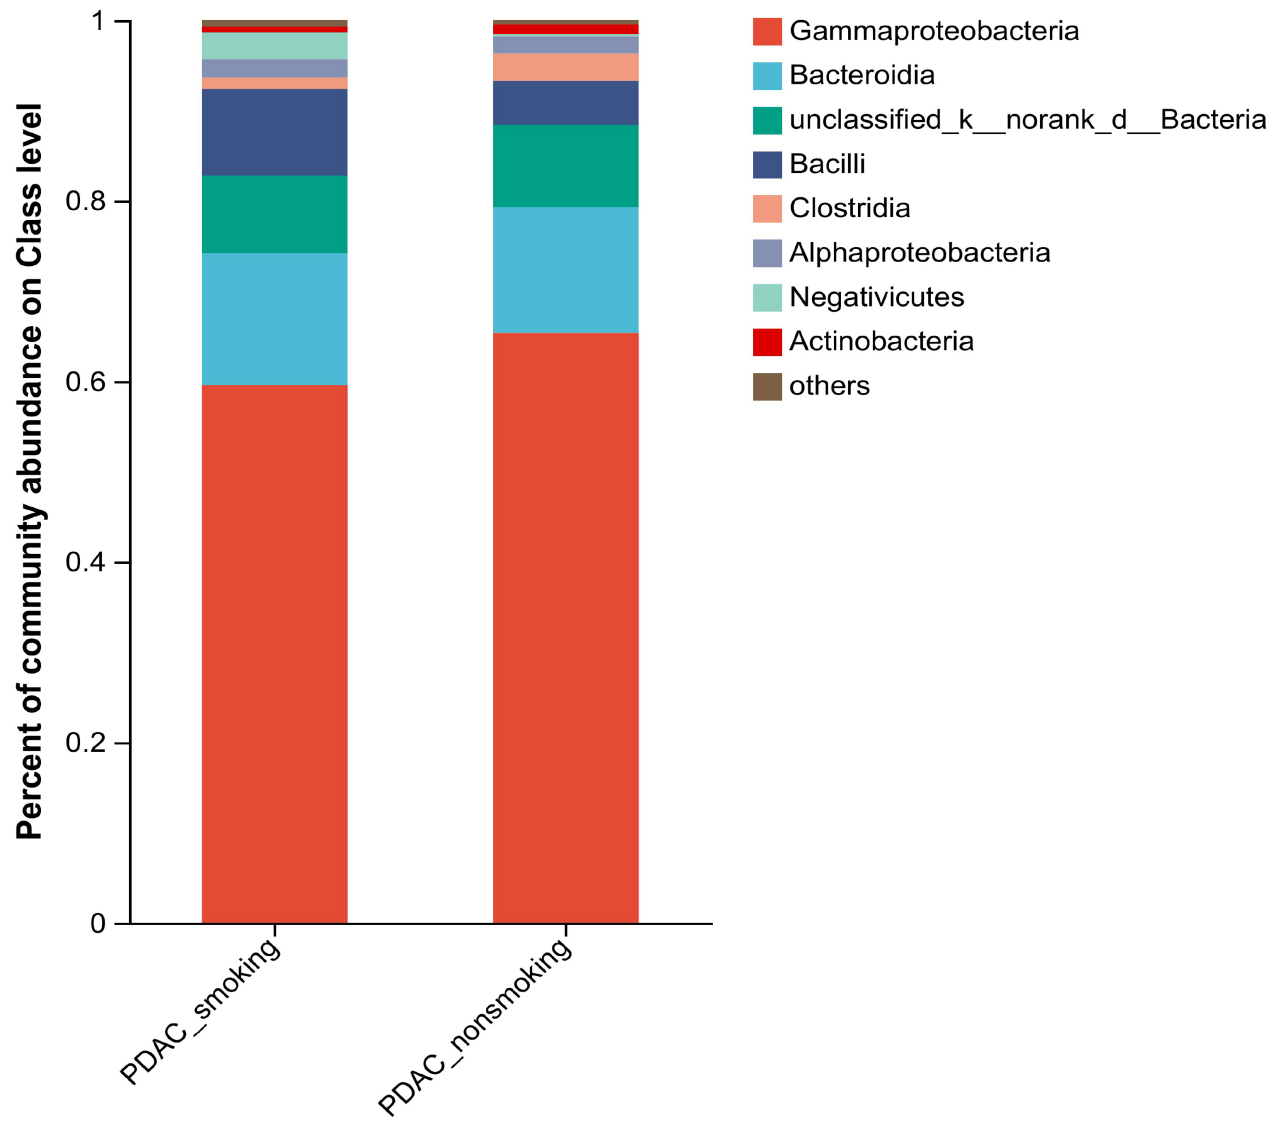

**Fig. S3** Bacterial composition at the class level of subjects between the smoking PDAC group and non-smoking PDAC group in the paracancerous tissue of surgical samples.



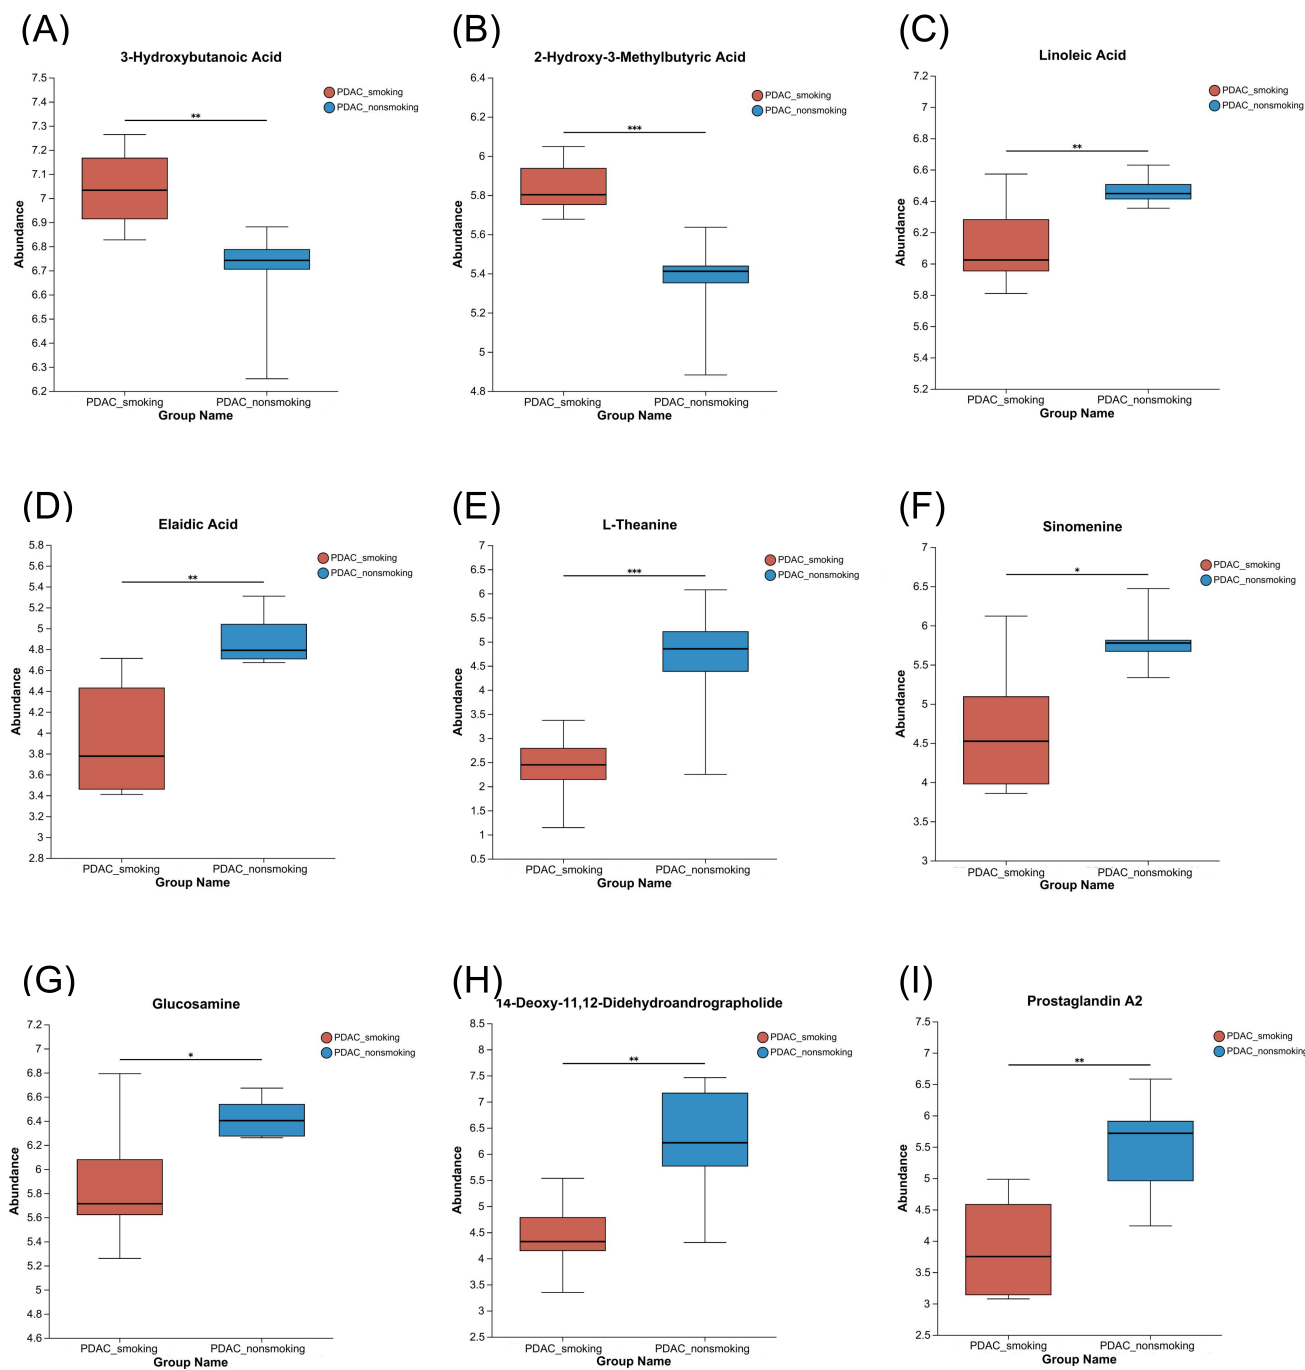

**Fig. S4 Partial differential metabolites in paracancerous tissue of surgical samples from smoking vs. non-smoking PDAC.** 3-hydroxybutanoic acid (A), 2-hydroxy-3-methylbutyric acid (B), linoleic acid (C), elaidic acid (D), L-theanine (E), sinomenine (F), glucosamine (G), 14-deoxy-11, 12-didehydroandrographolide (H), prostaglandin A2 (I).  $P < 0.001$  is marked as \*\*\*,  $P < 0.01$  is marked as \*\*,  $P < 0.05$  is marked as \*.

## Community barplot analysis

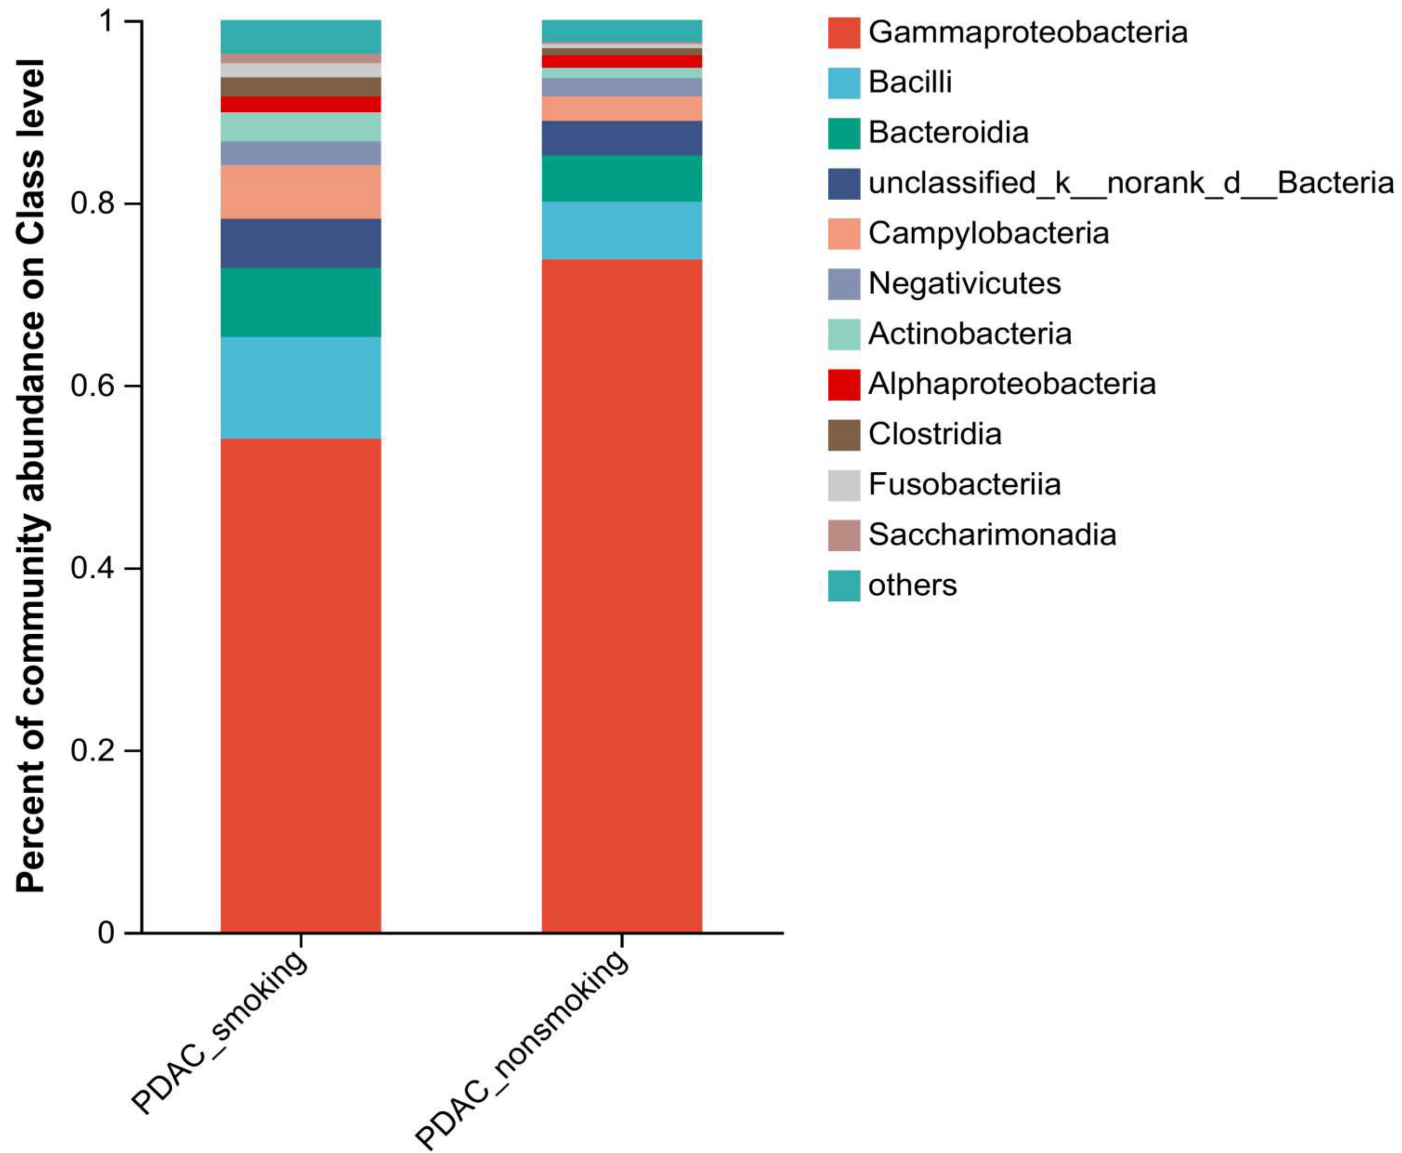

Fig. S5 Bacterial composition at the class level of subjects in FNA samples.
